# 1 **A comparative study of the capacity of mesenchymal** 2 **stromal cell lines to form spheroids**

3 Margaux Deynoux<sup>1,¶</sup>, Nicola Sunter<sup>1,¶</sup>, Elfi Ducrocq<sup>1</sup>, Hassan Dakik<sup>1</sup>, Roseline Guibon<sup>2,3</sup>,  
4 Julien Burlaud-Gaillard<sup>4,5</sup>, Lucie Brisson<sup>3</sup>, Louis-Romée le Nail<sup>6</sup>, Olivier Hérault<sup>1,7</sup>, Jorge  
5 Domenech<sup>1,7</sup>, Philippe Roingard<sup>4,5</sup>, Gaëlle Fromont<sup>2,3</sup>, Frédéric Mazurier<sup>1,\*</sup>

6

7 <sup>1</sup> Université de Tours, EA 7501 GICC, CNRS ERL 7001 LNOx, Tours, France

8 <sup>2</sup> Anatomie et cytologie pathologique, CHRU de Tours, Tours, France

9 <sup>3</sup> INSERM UMR1069, Nutrition, Croissance et Cancer, Université de Tours, Tours, France

10 <sup>4</sup> Plateforme IBiSA de Microscopie Electronique, Université et CHRU de Tours, Tours, France

11 <sup>5</sup> INSERM U1259 MAVIVH, Université et CHRU de Tours, Tours, France

12 <sup>6</sup> Service de Chirurgie orthopédique, CHU Tours

13 <sup>7</sup> Service d'hématologie biologique, CHRU de Tours, Tours, France

14 <sup>¶</sup> These authors contributed equally to this work.

15

16 **\* Corresponding author**

17 E-mail: frederic.mazurier@inserm.fr (FM)

## 18 **Abstract**

19 Mesenchymal stem cells (MSCs)-derived spheroid models favor maintenance of stemness, *ex*  
20 *vivo* expansion and transplantation efficacy. Spheroids may also be considered as useful  
21 surrogate models of the hematopoietic niche. However, accessibility to primary cells, from bone  
22 marrow (BM) or adipose tissues, may limit their experimental use and the lack of consistency  
23 in methods to form spheroids may affect data interpretation. In this study, we aimed to create a  
24 simple model by examining the ability of cell lines, from human (HS-27a and HS-5) and murine  
25 (MS-5) BM origins, to form spheroids, compared to primary human MSCs (hMSCs). Our  
26 protocol efficiently allowed the spheroid formation from all cell types within 24 hours. Whilst  
27 hMSCs-derived spheroids began to shrink after twenty-four hours, the size of spheroids derived  
28 from cell lines remained constant during three weeks. The difference was partially explained  
29 by the balance between proliferation and cell death, which could be triggered by hypoxia and  
30 induced oxidative stress. Our results demonstrate that, unlike hMSCs, MSC cell lines make  
31 reproducible spheroids that are easily handled. Thus, this model could help in understanding  
32 mechanisms involved in MSC functions and may provide a simple model by which to study  
33 cell interactions in the BM niche.

## 34 **Introduction**

35           Over the last two decades, extensive studies have attempted to characterize  
36 mesenchymal stem cell (MSC). Initially described in the bone marrow (BM), MSCs were later  
37 found in almost all adult and fetal tissues [1]. Their classification rapidly suffered from a lack  
38 of clear phenotypical definition. Therefore, in 2006, the International Society for Cellular  
39 Therapy (ISCT) defined MSCs according to three minimal criteria: adherence to plastic,  
40 specific cell surface markers and multipotent potential. Indeed, MSCs are classically described  
41 as stem cells that are able to differentiate into osteoblasts, adipocytes and chondroblasts [2],  
42 making them an attractive source of cells in regenerative medicine. Subsequent studies have  
43 also established their ability to differentiate into cardiomyocytes [3], neurons [4], epithelial  
44 cells [5] and hepatocytes [6]. The discovery of the multiple functions of MSC, such as those  
45 involved in the anti-inflammatory response [7] and in injury repair [8,9] confirmed them as  
46 promising cellular tools in regenerative medicine.

47           Furthermore, MSCs represent a key component of the BM microenvironment  
48 supporting normal hematopoiesis through the regulation of stem cell renewal and differentiation  
49 processes, but also fueling malignant cells and protecting them from therapeutic agents [10].  
50 As such, primary MSCs have often been used as feeder layers in long-term co-culture of  
51 hematopoietic cells *in vitro* in preclinical studies [11]. With the aim of standardization, the  
52 murine MS-5 cell line became the gold-standard for both normal or malignant hematopoietic  
53 cell culture [12]. This robust co-culture model has been widely used and has contributed to the  
54 characterization of hematopoietic stem cells (HSC) [11]. This 2D system, while closer to BM  
55 physiology than the culture of hematopoietic cells alone, still lacks the three-dimensional  
56 complexity of the BM niche. Thus, although widely used, it is certainly not sufficiently

57 consistent at predicting *in vivo* responses [13]. Therefore, a 3D system might be a better  
58 alternative to mimic the BM microenvironment.

59         Critically, the culture leads to rapid loss of MSC pluripotency and supportive functions.  
60 Therefore, a wide range of techniques to form 3D MSC structures, from the simplest spheroids  
61 to the more complex matrix-based structures, have been proposed [14]. Studies of spheroids,  
62 also called mesenspheres, were mostly dedicated to the examination of MSC stemness and  
63 differentiation abilities, such as osteogenesis, in order to improve their *in vitro* expansion and  
64 transplantation efficacy in regenerative medicine [15,16]. Furthermore, this model has also  
65 been tested as a surrogate niche for hematopoietic cells [17–23]. Spheroids take advantage of  
66 the ability of MSCs to self-aggregate, which is improved by using various approaches such as  
67 low adhesion plates, natural and artificial (centrifugation) gravity, cell matrix or more complex  
68 scaffolds [13,14,24,25]. Classically, studies have used human primary MSCs, from BM, cord  
69 blood and lipoaspirate, or rodent sources [15,26].

70         Although immortalized MSCs, or well characterized cell lines, could bypass the lack of  
71 primary cells and avoid the variability involved with use of primary human MSCs (hMSCs)  
72 samples, they are rarely employed to make spheroids [27,28]. Cell lines would also allow better  
73 standardization of the spheroid formation protocol. In this study, we examined the spheroid-  
74 forming capacity of two human cell lines (HS-27a and HS-5) and the murine gold-standard  
75 MS-5, in comparison with hMSCs. We defined a simple and fast method using standard matrix  
76 to form spheroids and characterized them in terms of physical features, cell proliferation and  
77 death.

78

## 79 **Materials and methods**

### 80 **Cell culture and reagents**

81 Murine MS-5 bone marrow (BM) stromal cell line was kindly provided by Mori KJ  
82 (Niigata University, Japan) [29]. Human HS-27a and HS-5 BM stromal cell lines were  
83 purchased from the American Type Culture Collection (ATCC CRL-2496 and CRL-11882,  
84 respectively). Primary human MSCs (hMSCs) were obtained by iliac crest aspiration from  
85 informed consent patients undergoing orthopedic surgery (Cardiovascular Surgery Department,  
86 Trousseau Hospital, Tours, France). HS-27a and HS-5 cell lines were cultured in RPMI 1640  
87 (Life Technologies, Villebon-sur-Yvette, France) and hMSCs and MS-5 in MEM Alpha (Life  
88 Technologies). All medium were supplemented with 10 % heat-inactivated fetal bovine serum  
89 (FBS), 2 mM L-glutamine, 100 U/mL penicillin and 100 µg/mL streptomycin (all from Life  
90 Technologies). For hMSCs culture only, 0.004 % of recombinant human FGF basic (FGF-2,  
91 R&D Systems, Abingdon, United Kingdom) was added. Cells were maintained in a saturated  
92 humidified atmosphere at 37°C and 5 % CO<sub>2</sub>. HS-27a, HS-5 and MS-5 cell lines were used for  
93 experiments between passages 5 and 20, and hMSCs at passage 2.

94

### 95 **Spheroids formation**

96 For one spheroid, 30,000 cells were cultured in 100 µL of medium, supplemented by  
97 0.25 % to 1 % of either Methocult™ SF H4236 or H4100 (StemCell, Grenoble, France), and  
98 seeded in U-bottomed 96-well plate (Sarstedt, Marnay, France). The medium was the same as  
99 that of the normal culture for each cell line but supplemented with heat inactivated FBS to reach  
100 15 %. At days as detailed, microscopic analysis was performed using a Leica DMIL microscope

101 (Leica, Nanterre, France), coupled to a DXM1200F camera (Nikon, Champigny-sur-Marne,  
102 France). To determine the number of cells in each spheroid over time, 12 spheroids per  
103 experiment were pooled and dissociated with 2 mg/mL collagenase 1A (Sigma-Aldrich, Saint-  
104 Quentin-Fallavier, France), 10 min at 37°C, with agitation every two minutes, and then counted  
105 by the trypan blue exclusion assay.

106

## 107 **Time-lapse video**

108 Automatic acquisitions were performed on a Nikon Eclipse TI-S microscope, coupled  
109 to a DS Qi2 camera (Nikon). The system includes a cage incubator (Okolab, Pozzuoli, NA,  
110 Italy) controlling temperature and level of CO<sub>2</sub>. Analyses were performed using both NIS  
111 Element BR (Nikon) and Fiji/ImageJ softwares.

112

## 113 **Scanning electron microscopy**

114 Spheroids were fixed by incubation for 24 h in 4 % paraformaldehyde, 1 %  
115 glutaraldehyde in 0.1 M phosphate buffer (pH 7.2). Samples were then washed in phosphate-  
116 buffered saline (PBS) and post-fixed by incubation with 2 % osmium tetroxide for 1 h.  
117 Spheroids were then fully dehydrated in a graded series of ethanol solutions, and dried in  
118 hexamethyldisilazane (HMDS, Sigma-Aldrich). Finally, samples were coated with 40 Å  
119 platinum, using a PECS 682 apparatus (Gatan, Evry, France), before observation under an Ultra  
120 plus FEG-SEM scanning electron microscope (Zeiss, Marly-le-Roi, France).

121

## 122 **Transmission electron microscopy**

123           Spheroids were fixed by incubation for 24 h in 4 % paraformaldehyde, 1 %  
124 glutaraldehyde in 0.1 M phosphate buffer (pH 7.2). Samples were then washed in phosphate-  
125 buffered saline (PBS) and post-fixed by incubation with 2 % osmium tetroxide for 1 h.  
126 Spheroids were then fully dehydrated in a graded series of ethanol solutions and propylene  
127 oxide. Impregnation step was performed with a mixture of (1:1) propylene oxide/Epon resin,  
128 and then left overnight in pure resin. Samples were then embedded in Epon resin, which was  
129 allowed to polymerize for 48 h at 60°C. Ultra-thin sections (90 nm) were obtained with an EM  
130 UC7 ultramicrotome (Leica). Sections were stained with 5 % uranyl acetate (Agar Scientific,  
131 Stansted, United Kingdom), 5 % lead citrate (Sigma-Aldrich) and observations were made with  
132 a transmission electron microscope (Jeol, JEM 1011, Croissy-sur-Seine, France).

133

## 134 **Immunohistochemistry**

135           At least five spheroids per conditions were pooled, fixed in formalin, embedded in  
136 paraffin and cut in 3-4 µm sections on Superfrost Plus slides. Slides were deparaffinized,  
137 rehydrated and heated in citrate buffer pH 6 for antigenic retrieval. After blocking for  
138 endogenous peroxidase with 3 % hydrogen peroxide, the primary antibodies were incubated.  
139 The panel of primary antibody included anti-HIF-1α (Abcam ab51608, Paris, France) (dilution  
140 1/200, incubation 1 h), VEGF-A (Abcam ab1316, dilution 1/200, incubation 1 h), HO-1  
141 (Abcam ab52947, dilution 1/1 000, incubation 1 h), CA-IX (Novocastra clone TH22, Nanterre,  
142 France) (dilution 1/100, incubation 20 min), and Ki-67 (DakoCytomation clone 39-9, Glostrup,  
143 Denmark) (dilution 1/50, incubation 30 min). Immunohistochemistry was performed with  
144 either the automated BenchMark XT slide stainer (Ventana Medical System Inc.) using

145 OptiView Detection Kit (Ventana Medical System Inc.) (for CA-IX and Ki-67), or manually  
146 using the streptavidin-biotin-peroxidase method with diaminobenzidine as the chromogen (Kit  
147 LSAB, DakoCytomation). Slides were finally counterstained with haematoxylin. Negative  
148 controls were obtained after omission of the primary antibody or incubation with a non-specific  
149 antibody.

150

## 151 **Quantitative real-time PCR**

152 Total RNAs were extracted using TRIzol reagent (15596-026, Life Technologies) and  
153 reverse transcription was performed with the SuperScript™ VILO™ cDNA Synthesis Kit  
154 (11754-050, Invitrogen, Villebon-sur-Yvette, France), both according to the manufacturer's  
155 procedures. qRT-PCR was performed on a LightCycler® 480 (Roche, Switzerland) with the  
156 LightCycler® 480 Probes Master (04887301001, Roche). *GAPDH*, *ACTB*, *RPL13A* and *EF1A*  
157 genes were used as endogenous genes for normalization. Primer sequences (S1 Table) were  
158 designed with the ProbeFinder software (Roche), and all reactions were run in triplicate.

159

## 160 **Cell cycle analysis**

161 Spheroids were dissociated with 2 mg/mL collagenase 1A (Sigma-Aldrich), 10 min, at  
162 37°C, with agitation every two minutes. Cells were fixed with 2 % paraformaldehyde/0.03 %  
163 saponin for 15 min at room temperature (RT), and washed three times for 5 min with  
164 10 % FBS/0.03 % saponin. Cells were then stained with 7-Aminoactinomycin D (7-AAD,  
165 Sigma-Aldrich) and an AF488-conjugated anti-KI-67 antibody (BD Biosciences, Le Pont de  
166 Claix, France) or the AF488-conjugated IgG<sub>1</sub> isotype control (BD Biosciences). Experiments



167 were performed on Accuri™ C6 flow cytometer (BD Biosciences) and data were analyzed with  
168 the FlowJo V10.4.1 software (Tree Star Inc.).

169

## 170 **Statistical analysis**

171 All statistical analyses were performed using R software. The Mann-Whitney test was  
172 used to compare two conditions and Kruskal-Wallis for multiple comparisons, followed by a  
173 Dunn's *post hoc* test. The threshold for significance was set up to a p-value of 0.05.

174

## 175 **Results**

### 176 **Establishment of hMSC-derived spheroids by cell aggregation**

#### 177 **method**

178 Among different methods to form MSC-spheroids, we followed an approach based on  
179 cell aggregation in methylcellulose-based medium [27] (Fig 1A). To establish a protocol that  
180 is simple, reproducible and compatible with hematopoietic cell culture, two commercial  
181 methylcelluloses commonly used for hematopoietic cell assays were tested. In general, a range  
182 from 0.01 to 1 % of methylcellulose was used [27,30–33], so we tested three different  
183 concentrations (0.25, 0.5 and 1 %). We also tested a hanging drop technique [31,33–35] and  
184 the previously described U-bottomed 96-well plates methods [27,30,32,33,36]. Both techniques  
185 worked well for primary hMSCs but the second was more appropriated for further analyses and  
186 offered lesser dehydration (data not shown). The SF H4236 methylcellulose at a concentration  
187 of 0.5 % was adopted because it generated one spheroid per well with lower condensation

188 aspect for primary hMSCs (Fig 1B). Under these culture conditions, hMSCs were able to form  
189 spheroids rapidly, in as little as five hours of culture (S1 Video), which is consistent with  
190 previous studies [27,32,37].

191

192 **Fig 1. Spheroids formation from hMSCs.** (A) Schematic representation of experimental plan.  
193 (B) 30,000 hMSCs per well were seeded into U-bottomed 96-well in medium containing  
194 0.25 %, 0.5 % or 1 % of methylcellulose (Methocult™ H4100 or SF H4236). Microscopy  
195 analysis was performed after 24 h (scale bars = 500  $\mu$ m).

196

## 197 **Formation of spheroids from MSC cell lines**

198 The spheroid-forming capacity was followed for two human cell lines, HS-27a and HS-  
199 5, and compared to that of hMSCs. These cell lines have been obtained by immortalization of  
200 hMSCs with the papilloma virus E6/E7 genes [38,39]. HS-27a cells support hematopoietic stem  
201 cell maintenance (self-renewal, formation of cobblestone areas), whereas HS-5 cells mainly  
202 sustain proliferation and differentiation [38–40]. Unlike hMSCs, they retained the ability to  
203 form spheres but required about 10 hours to make rounded spheroids (S2 and S3 Videos).  
204 Although MSCs of various origins formed spheroids of equivalent sizes (about 300  $\mu$ m of  
205 diameter) after 24 hours, hMSCs-derived spheroids rapidly condensed and reached half of their  
206 initial perimeter after 14 days of culture (Fig 2A and B). In contrast to hMSCs, the perimeter  
207 of spheroids resulting from both cell lines remained constant during three weeks. Knowing that  
208 hMSCs and cell lines may differ in their growth properties, we used the murine MS-5 cell line  
209 that has contact inhibition [29]. This cell line was able to quickly form spheroids similarly to  
210 the other cell lines (S4 Video). It is noteworthy that MS-5 cells initially formed a flat multilayer

211 disk of cells prior to contracting into spheres. Similarly to the spheroids derived from human  
212 cell lines, spheroids from MS-5 cells kept the same size over time (S1A and S1B Fig). This  
213 suggests that shrinking might be an intrinsic property or extracellular matrix (ECM)  
214 composition of primary cells rather than related to cell proliferation control. We thus examined  
215 whether the difference in the size maintenance between various MSCs might be attributed to  
216 the cell number per spheroid. In order to quantify the viable cells, spheroids were dissociated  
217 at different timepoints after seeding. In accordance with the decrease in circumference, the  
218 number of cells per spheroid for hMSCs dramatically dropped within seven days (Fig 2C),  
219 which was in agreement with other studies [31,35]. Remarkably, although keeping the same  
220 size, HS-27a-derived spheroids, as well as the MS-5 ones, had lost viable cells similarly to  
221 hMSCs (Fig 2C and S1C Fig). In contrast, HS-5-derived spheroids had less obvious decrease  
222 in cell number with time (Fig 2C). Overall, the size reduction does not seem to be strictly  
223 attributable to reduced cell number in spheroids and could be possibly attributed to other factors  
224 such as the ECM composition.

225

226 **Fig 2. Follow up of the spheroids derived from various MSCs.** (A) Microscopy analysis of  
227 hMSCs-, HS-27a- and HS-5-derived spheroids over 21 days in culture (scale bars = 100  $\mu$ m).  
228 (B) Perimeter was measured with an arbitrary unit; each experiment is the mean of at least  
229 10 spheroids from n = 3 experiments. Data are mean  $\pm$  SD; \* compared to day 1; \*  $p \leq 0.01$ .  
230 (C) Number of living cells per spheroids over 21 days in culture (hMCSs n = 3; HS-27a and  
231 HS-5 n = 4; each experiment is the mean of 12 spheroids).

232

## 233 **Electron microscopy observation of the MSCs-derived spheroids**

234 Scanning electron microscopy (SEM) confirmed the shrinking of hMSC-derived  
235 spheroids (Fig 3A and S1D Fig). SEM also revealed at higher magnification that spheroids from  
236 hMSCs are highly cohesive, showing tight intercellular connections forming a flat surface,  
237 whereas HS-27a, HS-5 and MS-5 spheroids exhibited more rounded cells at their surface  
238 (Fig 3B and S1E Fig). This phenomenon intensified over the time and, in line with the  
239 assumption that ECM composition is different, may explain the size reduction of hMSC-derived  
240 spheroids compared to the cell lines. From day 7 for cell lines and day 14 for primaries, spheroid  
241 structure began to change, suggesting a progressive cell death. Further analysis by transmission  
242 electron microscopy (TEM) to investigate the ultrastructure of the cells within the spheroids  
243 showed the appearance of a progressive cell injury, thus confirming induced cell death (Fig 3C  
244 and S1F Fig).

245

246 **Fig 3. Electron microscopy observation of MSCs-derived spheroids.** (A, B) Scanning  
247 electron microscopy (SEM) and (C) transmission electronic microscopy (TEM) analysis of  
248 spheroids derived from hMSCs, HS-27a and HS-5 cells, over 14 days (scale bars = 100  $\mu\text{m}$  (A),  
249 20  $\mu\text{m}$  (B and C)).

250

## 251 **Cell death and proliferation analyses of the MSCs-derived** 252 **spheroids**

253 To explain why spheroids had decreased cell number over time, we proposed an  
254 imbalance between cell death and cell proliferation. Thus, apoptosis and cell cycle were

255 measured by flow cytometry using 7-AAD/Ki-67 staining (Fig 4A). First, increasing sub-G<sub>0</sub>/G<sub>1</sub>  
256 cell population revealed a strong induction of cell death after 14 days in spheroids obtained  
257 with hMSCs, while a more moderate cell death was observed after seven days for the two  
258 human cell lines (Fig 4B). Although harvested at the same confluency, primary cells appeared  
259 already much more quiescent than HS-27a or HS-5 cells at day 0 (Fig 4C). Then, a significant  
260 proportion of cells remained proliferating in spheroids until day 3 for HS-27a and day 7 for HS-  
261 5 cells. Remarkably, while closer to HS-27a cells in terms of perimeter and number of cells,  
262 MS-5 cells had a massive increase in cell death and almost no proliferation (S1G and S1H Fig).  
263 This suggests that, based on proliferation and cell death, the MS-5 cell line is more similar to  
264 primary cells than others, probably due to their contact inhibition, which limits their  
265 proliferation capacity. Ki-67 detection by immunocytochemistry, in hMSCs and human cell lines,  
266 revealed homogeneous staining at day 1 indicating proliferation in the whole spheroid (Fig 4D)  
267 in agreement with a previous study [41]. It also confirmed a lower proliferation rate of hMSCs  
268 compared to cell lines and a rapid proliferation arrest with only few Ki-67-positive cells  
269 remaining at the periphery of the spheroid at day 3. A progressive decrease in the proliferation  
270 for the two human cell lines supported the results obtained by flow cytometry. Interestingly,  
271 decreased proliferation appears in the entire spheroid and is not restricted to in-depth  
272 localizations. These data showed that spheroids are characterized by imbalance between cell  
273 death and proliferation, which may explain the highest loss of cells over time.

274

275 **Fig 4. Determination of proliferation and apoptosis of MSCs-derived spheroids.** (A-C) Cell  
276 cycle analysis of spheroids over 21 days in culture. (A) Representative gating strategy from  
277 hMSCs at day 0, (B) sub-G<sub>1</sub> apoptosis quantification (hMSCs n = 6; HS-27a and HS-5 n = 3)  
278 and (C) cell cycle quantification (hMSCs n = 6; HS-27a and HS-5 n = 5; \* for G<sub>0</sub>; † for G<sub>1</sub>,

279 # for S/G<sub>2</sub>/M) (data are mean ± SD; \*/#/# compared to day 0; \*/# p ≤ 0.05; \*\*/#/## p ≤ 0.01).  
280 (D) Immunohistochemistry of Ki-67 at days 1, 3 and 7 for hMSCs-, HS-27a- and HS-5-derived  
281 spheroids (scale bars = 100 μm). Arrows indicate Ki-67-positive cells.

282

## 283 **Hypoxia and oxidative stress in MSCs-derived spheroids**

284 Like in tumor spheres [42,43], the appearance of an oxygen gradient and hypoxia in  
285 MSCs-derived spheroids [44] has been demonstrated. Carbonic anhydrase IX (CA-IX), a  
286 mediator of hypoxia-induced stress response, is commonly used as marker in tumors [45].  
287 Increased CA-IX has been observed in MSCs-derived spheroids, particularly in HS-27a cells  
288 (Fig 5A). The pro-survival adaptation to hypoxia occurs mainly through the stabilization of the  
289 hypoxia-inducible factors (HIFs). HIFs are key regulators of multiple cell processes, including  
290 cell cycle, metabolism, pH control and autophagy. Increasing expression of HIF-1α protein  
291 expression has been observed in spheroids over the time, as well as at the mRNA level mainly  
292 in hMSCs (Fig 5B). Finally, we examined the expression of *VEGFA*, a standard HIF  
293 transcriptionally regulated gene [46]. Its expression in hMSCs- and HS-27a-derived spheroids  
294 was already elevated at day 1, but strongly increased at both protein and mRNA levels over  
295 time (Fig 5C).

296

### 297 **Fig 5. Hypoxia detection of hMSCs- and HS-27a-derived spheroids over 7 days in culture.**

298 (A) Immunohistochemistry of CA-IX. (B) Immunohistochemistry and mRNA of HIF-  
299 1α. (X) Immunohistochemistry and mRNA expression of VEGF-A. (hMSCs n = 5; HS-27a  
300 n = 3; \* p ≤ 0.05; \*\* p ≤ 0.01; scale bars = 100 μm).

301 In certain circumstances, very low level of oxygen (anoxia) or long exposure to hypoxia  
302 may provoke DNA damage and oxidative stress that trigger apoptosis [42]. Besides hypoxia  
303 appearance in spheroids, cell aggregation may also stress the cells by itself and increase reactive  
304 oxygen species (ROS). Heme oxygenase 1 (HO-1) is induced by a variety of stressors, and is  
305 therefore a marker of hypoxia and oxidative stress [47]. Indeed, oxidative stress triggers nuclear  
306 relocation of NRF-2, a HO-1 transcription factor, which then leads to antioxidant response  
307 through induced expression of antioxidants by HO-1. In the spheroids, we observed a high  
308 expression of HO-1 at day 1, which increased over time (Fig 6A). Conversely, among the 24  
309 antioxidant genes (Patent WO2016083742), we found a total of seven genes upregulated in  
310 spheroids from the hMSCs and the HS-27a cell line (Fig 6B). Remarkably, of these genes, four  
311 (*GPX1*, *PRDX2*, *SOD1* and *SOD2*) were commonly upregulated in both cell types irrespective  
312 of their initial expression level.

313

314 **Fig 6. Oxidative stress detection of hMSCs- and HS-27a-derived spheroids over 7 days in**  
315 **culture.** (A) Immunohistochemistry of HO-1 (scale bars = 100  $\mu\text{m}$ ). (B) Expression of  
316 antioxidant genes (n = 3; data are mean; \* compared to 2D control (CTL); \*  $p \leq 0.05$ ;  
317 \*\*  $p \leq 0.01$ ).

318

319 Together, these data indicate concomitant appearance of hypoxia and oxidative stress in  
320 established MSCs-derived spheroids, which could therefore explain initial cell cycle arrest and  
321 further apoptosis in prolonged hypoxia [48].

322

## 323 **Stemness in MSCs-derived spheroids**

324           The 2D culture of MSCs critically leads to rapid loss of their pluripotency and  
325 supportive functions. In contrast, MSCs-derived spheroids have the potential to maintain  
326 stemness that could be demonstrated by the expression of three classical embryonic markers,  
327 OCT-4, SOX-2 and NANOG [32]. Furthermore, it has been described that hypoxia  
328 transcriptionally regulates these factors in a HIFs-dependent manner [49]. Therefore, in order  
329 to validate whether HS-27a behave similarly to hMSCs, we examined the expression of the  
330 genes coding for the three factors, over time. Results showed that hMSCs formation was  
331 accompanied by upregulation of *OCT4* and *SOX2*, in agreement with previous studies, but  
332 surprisingly showed no upregulation of *NANOG* (Fig 7A). HS-27a had similar expression level  
333 of the three genes to hMSCs in 2D culture and had progressive increased expression of all three  
334 markers (Fig 7B). These data confirmed that, like hMSCs, HS-27a had preserved a stemness  
335 capacity that could also be (re)activated during spheroid formation.

336

### 337 **Fig 7. Stemness detection of hMSCs- and HS-27a-derived spheroids over 7 days in culture.**

338 (A and B) Gene expression of *OCT4*, *NANOG* and *SOX2* for (A) hMSCs- and (B) HS-27a-  
339 derived spheroids (hMSCs n = 5; HS-27a n = 3; \* p ≤ 0.05; \*\* p ≤ 0.01).

340

## 341 **Discussion**

342           In the last decade, studies have shown that MSC spheroids could be a promising model  
343 for *in vitro* culture. Indeed, some have demonstrated their benefits in studying cardiac ischemia  
344 [50], cerebral ischemia [51], hindlimb ischemia [52] or bone repair [53]. In addition, spheroids



345 may be a good model to study the interaction of normal [17–19,21,22] or malignant  
346 hematopoietic cells [20,23] with their microenvironment. For instance, spheroids could be used  
347 to study the mechanisms triggering chemoresistance in leukemias [20,23]. However, studies  
348 might be limited by the availability of primary human MSCs and the reproducibility due to the  
349 different sources, while 2D co-cultures have been for a long time established with cell lines,  
350 mostly murine, such as MS-5 or M2-10B4 [11]. In this study, we chose the HS-27a and HS-5  
351 cell lines for their human origin and their capacity to sustain hematopoiesis in co-culture  
352 (Roecklein & Torok-Storb, 1995). Nonetheless, in contrast to the murine MS-5 cell line, they  
353 do not retain contact inhibition that certainly, although of human origin, have limited their use  
354 for long-term culture. We found that both human and murine cell lines, independently of their  
355 contact inhibition capacity, were able to provide quick and reproducible spheroids using  
356 standard methylcellulose, similarly to hMSCs, with the advantage of keeping the same size over  
357 time. The delay to achieve a complete spheroid, 5 h *versus* 10 h for hMSCs and cell lines,  
358 respectively, could certainly be attributed to sedimentation speed. In fact, cell lines are much  
359 smaller than primaries that could hence sediment faster. On the other hand, this phenomenon  
360 might also be attributed to spheroid condensation that could depend on ECM composition.  
361 Indeed, hMSCs-derived spheroids appeared more cohesive by SEM.

362         ECM may also explain, at least partially, shrinking of hMSC-derived spheroids.  
363 Shrinking has been previously reported for hMSCs [31,32,35,37,54–56] and has been attributed  
364 to induced autophagy [32]. Therefore, we could hypothesize that transformed cell lines may  
365 have lower autophagy, which is often induced in reduced or arrest cell growth [57]. Indeed,  
366 HS-27a and HS-5 cell lines continue to proliferate until 7 days, unlike hMSCs, and could block  
367 autophagy and compensate cell death. However, the number of viable HS-27a decreased over  
368 time and no apoptosis has been detected for any of the MSCs before seven days, which could

369 not explain the loss of cells. In agreement, others studies have also demonstrated an induction  
370 of apoptosis only after several days [35,54], but not at short term [58].

371 Studies have already reported oxygen gradients in tumor-spheres [42,43] as well as in  
372 MSCs-derived spheroids [44]. The hypoxia response mainly happens through the stabilization  
373 of hypoxia-inducible factors (HIFs), which are regulators of multiple biological processes, such  
374 as angiogenesis or energetic metabolism. HIFs have an essential pro-survival role by promoting  
375 genes, such as those involved in metabolism and autophagy [46]. However, acute and prolonged  
376 hypoxia may also trigger cell death through blocking DNA replication and induced oxidative  
377 stress [42]. Interestingly, cell lines showed increased hypoxia markers over time, and  
378 concomitant decreased cell cycle prior induced apoptosis. This is consistent with induced  
379 oxidative stress revealed by increased expression of HO-1 and antioxidant response.

380

## 381 **Conclusions**

382 Overall these data indicate that, like hMSCs, MSC cell lines make reproducible and  
383 easily handled spheroids. Remarkably, the HS-27a cell line more closely resemble primary cells  
384 than the HS-5 line. This is of a particular interest, since HS-27a has been shown to provide  
385 better support to HSCs [38–40]. Thus, this model could help in understanding mechanisms  
386 involved in MSC physiology and may be a simple model to study cell interactions in the  
387 hematopoietic niche. The model could also be extended to research metastatic process as  
388 previously described for breast cancer [28].

389

## 390 Acknowledgements

391

## 392 Supporting information

393 **S1 Fig. Spheroids formation of mouse MS-5 cell line.** (A) Microscopy analysis over 21 days  
394 in culture (scale bars = 100  $\mu\text{m}$ ). (B) Perimeter was measured with an arbitrary unit; each  
395 experiment is the mean of at least 10 spheroids ( $n = 3$ ; data are mean  $\pm$  SD). (C) Number of  
396 living cells per spheroids over 21 days in culture ( $n = 3$ ; each experiment is the mean of  
397 12 spheroids). (D, E) Scanning electron microscopy (SEM) and (F) transmission electronic  
398 microscopy (TEM) analysis over 14 days (scale bars = 100  $\mu\text{m}$  (D), 20  $\mu\text{m}$  (E and F)). (G) Sub-  
399  $G_1$  apoptosis quantification ( $n = 3$ ) and (H) cell cycle quantification over 21 days in culture  
400 ( $n = 3$ ; data are mean  $\pm$  SD).

401

402 **S1 Video.** A representative time-lapse video of spheroid formation. 30 000 primary MSCs  
403 seeded into U-bottomed 96-well, in medium containing 0.5 % of methylcellulose (Methocult™  
404 SF H4236) were followed via a Nikon Eclipse TI-S microscope for 24 hours.

405

406 **S2 Video.** A representative time-lapse video of spheroid formation. 30 000 HS-27a cells seeded  
407 into U-bottomed 96-well, in medium containing 0.5 % of methylcellulose (Methocult™ SF  
408 H4236) were followed via a Nikon Eclipse TI-S microscope for 24 hours.

409

410 **S3 Video.** A representative time-lapse video of spheroid formation. 30 000 HS-5 cells seeded  
411 into U-bottomed 96-well, in medium containing 0.5 % of methylcellulose (Methocult™ SF  
412 H4236) were followed via a Nikon Eclipse TI-S microscope for 24 hours.

413

414 **S4 Video.** A representative time-lapse video of spheroid formation. 30 000 MS-5 cells seeded  
415 into U-bottomed 96-well, in medium containing 0.5 % of methylcellulose (Methocult™ SF  
416 H4236) were followed via a Nikon Eclipse TI-S microscope for 24 hours.

417 **References**

- 418 1. Domenech J. What Are Mesenchymal Stromal Cells? Origin and Discovery of  
419 Mesenchymal Stromal Cells. In: Mesenchymal Stromal Cells as Tumor Stromal  
420 Modulators. 2017. p. 1–37.
- 421 2. Dominici M, Le Blanc K, Mueller I, Slaper-Cortenbach I, Marini F, Krause D, et al.  
422 Minimal criteria for defining multipotent mesenchymal stromal cells. The International  
423 Society for Cellular Therapy position statement. *Cytotherapy*. 2006;8(4):315–7.
- 424 3. Makino S, Fukuda K, Miyoshi S, Konishi F, Kodama H, Pan J, et al. Cardiomyocytes  
425 can be generated from marrow stromal cells in vitro. *J Clin Invest*. 1999;103(5):697–  
426 705.
- 427 4. Sanchez-Ramos J, Song S, Cardozo-Pelaez F, Hazzi C, Stedeford T, Willing A, et al.  
428 Adult bone marrow stromal cells differentiate into neural cells in vitro. *Exp Neurol*.  
429 2000;164(2):247–56.
- 430 5. Spees JL, Olson SD, Ylostalo J, Lynch PJ, Smith J, Perry A, et al. Differentiation, cell  
431 fusion, and nuclear fusion during ex vivo repair of epithelium by human adult stem cells  
432 from bone marrow stroma. *Proc Natl Acad Sci*. 2003;100(5):2397–402.
- 433 6. Hong SH, Gang EJ, Jeong JA, Ahn C, Hwang SH, Yang IH, et al. In vitro differentiation  
434 of human umbilical cord blood-derived mesenchymal stem cells into hepatocyte-like  
435 cells. *Biochem Biophys Res Commun*. 2005;330(4):1153–61.
- 436 7. Yan L, Zheng D, Xu RH. Critical role of tumor necrosis factor signaling in mesenchymal  
437 stem cell-based therapy for autoimmune and inflammatory diseases. *Front Immunol*.  
438 2018;9:1658.

- 439 8. Su P, Tian Y, Yang C, Ma X, Wang X, Pei J, et al. Mesenchymal stem cell migration  
440 during bone formation and bone diseases therapy. *Int J Mol Sci.* 2018;19(8):E2343.
- 441 9. Perez JR, Kouroupis D, Li DJ, Best TM, Kaplan L, Correa D. Tissue Engineering and  
442 Cell-Based Therapies for Fractures and Bone Defects. *Front Bioeng Biotechnol.*  
443 2018;6(105):1–23.
- 444 10. Pinho S, Frenette PS. Haematopoietic stem cell activity and interactions with the niche.  
445 *Nat Rev Mol Cell Biol.* 2019;20(5):303–20.
- 446 11. Vaidya A, Kale V. Hematopoietic stem cells, their niche, and the concept of co-culture  
447 systems: A critical review. *J Stem Cells.* 2015;10(1):13–31.
- 448 12. Dhimi SPS, Kappala SS, Thompson A, Szegezdi E. Three-dimensional ex vivo co-  
449 culture models of the leukaemic bone marrow niche for functional drug testing. *Drug*  
450 *Discov Today.* 2016;21(9):1464–71.
- 451 13. Cesarz Z, Tamama K. Spheroid Culture of Mesenchymal Stem Cells. *Stem Cells Int.*  
452 2016;2016:e9176357.
- 453 14. Lin RZ, Chang HY. Recent advances in three-dimensional multicellular spheroid culture  
454 for biomedical research. *Biotechnol J.* 2008;3(9–10):1172–84.
- 455 15. Baraniak PR, McDevitt TC. Scaffold-free culture of mesenchymal stem cell spheroids  
456 in suspension preserves multilineage potential. *Cell Tissue Res.* 2012;347(3):701–11.
- 457 16. Ghazanfari R, Li H, Zacharaki D, Lim HC, Scheduling S. Human Non-Hematopoietic  
458 CD271pos/CD140alow/neg Bone Marrow Stroma Cells Fulfill Stringent Stem Cell  
459 Criteria in Serial Transplantations. *Stem Cells Dev.* 2016;25(21):1652–8.

- 460 17. Futrega K, Atkinson K, Lott WB, Doran MR. Spheroid Coculture of Hematopoietic  
461 Stem/Progenitor Cells and Monolayer Expanded Mesenchymal Stem/Stromal Cells in  
462 Polydimethylsiloxane Microwells Modestly Improves In Vitro Hematopoietic  
463 Stem/Progenitor Cell Expansion . *Tissue Eng Part C Methods*. 2017;23(4):200–18.
- 464 18. De Barros APDN, Takiya CM, Garzoni LR, Leal-Ferreira ML, Dutra HS, Chiarini LB,  
465 et al. Osteoblasts and bone marrow mesenchymal stromal cells control hematopoietic  
466 stem cell migration and proliferation in 3D in vitro model. *PLoS One*. 2010;5(2):e9093.
- 467 19. Isern J, Martín-Antonio B, Ghazanfari R, Martín AM, López JA, DelToro R, et al. Self-  
468 Renewing Human Bone Marrow Mesenspheres Promote Hematopoietic Stem Cell  
469 Expansion. *Cell Rep*. 2013;3(5):1714–24.
- 470 20. Bruce A, Evans R, Mezan R, Shi L, Moses BS, Martin KH, et al. Three-dimensional  
471 microfluidic tri-culture model of the bone marrow microenvironment for study of acute  
472 lymphoblastic leukemia. *PLoS One*. 2015;10(10):e0140506.
- 473 21. Wuchter P, Saffrich R, Giselbrecht S, Nies C, Lorig H, Kolb S, et al. Microcavity arrays  
474 as an in vitro model system of the bone marrow niche for hematopoietic stem cells. *Cell*  
475 *Tissue Res*. 2016;364(3):573–84.
- 476 22. Leisten I, Kramann R, Ventura Ferreira MS, Bovi M, Neuss S, Ziegler P, et al. 3D co-  
477 culture of hematopoietic stem and progenitor cells and mesenchymal stem cells in  
478 collagen scaffolds as a model of the hematopoietic niche. *Biomaterials*.  
479 2012;33(6):1736–47.
- 480 23. Aljitawi OS, Li D, Xiao Y, Zhang D, Ramachandran K, Stehno-Bittel L, et al. A novel  
481 three-dimensional stromal-based model for in vitro chemotherapy sensitivity testing of  
482 leukemia cells. *Leuk Lymphoma*. 2014;55(2):378–91.

- 483 24. Sart S, Tsai A-C, Li Y, Ma T. Three-dimensional aggregates of mesenchymal stem cells:  
484 cellular mechanisms, biological properties, and applications. *Tissue Eng Part B Rev.*  
485 2014;20(5):365–80.
- 486 25. Egger D, Tripisciano C, Weber V, Dominici M, Kasper C. Dynamic Cultivation of  
487 Mesenchymal Stem Cell Aggregates. *Bioengineering.* 2018;5(2):1–15.
- 488 26. Ong SM, Zhang C, Toh YC, Kim SH, Foo HL, Tan CH, et al. A gel-free 3D microfluidic  
489 cell culture system. *Biomaterials.* 2008;29(22):3237–44.
- 490 27. Saleh FA, Frith JE, Lee JA, Genever PG. Three-Dimensional In Vitro Culture  
491 Techniques for Mesenchymal Stem Cells. In: *Progenitor Cells: Methods and Protocols.*  
492 2012. p. 31–45.
- 493 28. Cavnar SP, Rickelmann AD, Meguiar KF, Xiao A, Dosch J, Leung BM, et al. Modeling  
494 Selective Elimination of Quiescent Cancer Cells from Bone Marrow. *Neoplasia.*  
495 2015;17(8):625–33.
- 496 29. Itoh K, Tezuka H, Sakoda H, Konno M, Nagata K, Uchiyama T, et al. Reproducible  
497 establishment of hemopoietic supportive stromal cell lines from murine bone marrow.  
498 *Exp Hematol.* 1989;17(2):145–53.
- 499 30. Saleh FA, Whyte M, Genever PG. Effects of endothelial cells on human mesenchymal  
500 stem cell activity in a three-dimensional in vitro model. *Eur Cells Mater.* 2011;22:242–  
501 57.
- 502 31. Shearier E, Xing Q, Qian Z, Zhao F. Physiologically Low Oxygen Enhances  
503 Biomolecule Production and Stemness of Mesenchymal Stem Cell Spheroids. *Tissue*  
504 *Eng Part C.* 2016;22(4):360–9.



- 505 32. Pennock R, Bray E, Pryor P, James S, McKeegan P, Sturmey R, et al. Human cell  
506 dedifferentiation in mesenchymal condensates through controlled autophagy. *Sci Rep.*  
507 2015;5:e13113.
- 508 33. Matak D, Brodaczewska KK, Lipiec M, Szymanski Ł, Szczylik C, Czarnecka AM.  
509 Colony, hanging drop, and methylcellulose three dimensional hypoxic growth  
510 optimization of renal cell carcinoma cell lines. *Cytotechnology.* 2017;69(4):565–78.
- 511 34. Foty R. A Simple Hanging Drop Cell Culture Protocol for Generation of 3D Spheroids.  
512 *J Vis Exp.* 2011;20(51):1–4.
- 513 35. Schmal O, Seifert J, Schäffer T, Walter CB, Aicher WK, Klein G. Hematopoietic Stem  
514 and Progenitor Cell Expansion in Contact with Mesenchymal Stromal Cells in a Hanging  
515 Drop Model Uncovers Disadvantages of 3D. *Stem Cells Int.* 2015;2016:e4148093.
- 516 36. Blocki A, Wang Y, Koch M, Peh P, Beyer S, Law P, et al. Not All MSCs Can Act as  
517 Pericytes : Functional In Vitro Assays to Distinguish Pericytes from Other Mesenchymal  
518 Stem Cells in Angiogenesis. *Stem Cells Dev.* 2013;22(17):2347–55.
- 519 37. Redondo-Castro E, Cunningham CJ, Miller J, Cain S, Allan SM, Pinteaux E. Generation  
520 of Human Mesenchymal Stem Cell 3D Spheroids Using Low-binding Plates. *Bio Protoc.*  
521 2018;8(16):e2968.
- 522 38. Roecklein BA, Torok-Storb B. Functionally distinct human marrow stromal cell lines  
523 immortalized by transduction with the human papilloma virus E6/E7 genes. *Blood.*  
524 1995;85(4):997–1005.
- 525 39. Torok-Storb B, Iwata M, Graf L, Gianotti J, Horton H, Byrne MC. Dissecting the marrow  
526 microenvironment. In: *Annals of the New York Academy of Sciences.* 1999. p. 164–70.

- 527 40. Iwata M, Sandstrom RS, Delrow JJ, Stamatoyannopoulos JA, Torok-Storb B.  
528 Functionally and phenotypically distinct subpopulations of marrow stromal cells are  
529 fibroblast in origin and induce different fates in peripheral blood monocytes. *Stem Cells*  
530 *Dev.* 2014;23(7):729–40.
- 531 41. Li Y, Guo G, Li L, Chen F, Bao J, Shi Y jun, et al. Three-dimensional spheroid culture  
532 of human umbilical cord mesenchymal stem cells promotes cell yield and stemness  
533 maintenance. *Cell Tissue Res.* 2015;360(2):297–307.
- 534 42. Riffle S, Hegde RS. Modeling tumor cell adaptations to hypoxia in multicellular tumor  
535 spheroids. *J Exp Clin Cancer Res.* 2017;36(1):e102.
- 536 43. Leek R, Grimes DR, Harris AL, McIntyre A. Methods: Using Three-Dimensional  
537 Culture (Spheroids) as an In Vitro Model of Tumour Hypoxia. In: *Tumor*  
538 *microenvironment.* 2016. p. 167–96.
- 539 44. Sharma MB, Limaye LS, Kale VP. Mimicking the functional hematopoietic stem cell  
540 niche in vitro: Recapitulation of marrow physiology by hydrogel-based three-  
541 dimensional cultures of mesenchymal stromal cells. *Haematologica.* 2012;97(5):651–60.
- 542 45. McDonald PC, Dedhar S. Carbonic anhydrase IX (CAIX) as a mediator of hypoxia-  
543 induced stress response in cancer cells. In: *SubCellular Biochemistry.* 2014. p. 255–69.
- 544 46. Zhang CC, Sadek HA. Hypoxia and Metabolic Properties of Hematopoietic Stem Cells.  
545 *Antioxid Redox Signal.* 2014;20(12):1891–901.
- 546 47. Dunn LL, Midwinter RG, Ni J, Hamid HA, Parish CR, Stocker R. New insights into  
547 intracellular locations and functions of heme oxygenase-1. *Antioxidants Redox Signal.*  
548 2014;20(11):1723–42.

- 549 48. Riffle S, Pandey RN, Albert M, Hegde RS. Linking hypoxia, DNA damage and  
550 proliferation in multicellular tumor spheroids. *BMC Cancer*. 2017;17(1):1–12.
- 551 49. Drela K, Sarnowska A, Siedlecka P, Szablowska-Gadomska I, Wielgos M, Jurga M, et  
552 al. Low oxygen atmosphere facilitates proliferation and maintains undifferentiated state  
553 of umbilical cord mesenchymal stem cells in an hypoxia inducible factor-dependent  
554 manner. *Cytotherapy*. 2014;16(7):881–92.
- 555 50. Ceccaldi C, Bushkalova R, Alfarano C, Lairez O, Calise D, Bourin P, et al. Evaluation  
556 of polyelectrolyte complex-based scaffolds for mesenchymal stem cell therapy in cardiac  
557 ischemia treatment. *Acta Biomater*. 2014;10(2):901–11.
- 558 51. Guo L, Ge J, Zhou Y, Wang S, Zhao RCH, Wu Y. Three-Dimensional Spheroid-Cultured  
559 Mesenchymal Stem Cells Devoid of Embolism Attenuate Brain Stroke Injury After  
560 Intra-Arterial Injection. *Stem Cells Dev*. 2013;23(9):978–89.
- 561 52. Bhang SH, Lee S, Shin J-Y, Lee T-J, Kim B-S. Transplantation of Cord Blood  
562 Mesenchymal Stem Cells as Spheroids Enhances Vascularization. *Tissue Eng Part A*.  
563 2012;18(19–20):2138–47.
- 564 53. Yamaguchi Y, Ohno J, Sato A, Kido H, Fukushima T. Mesenchymal stem cell spheroids  
565 exhibit enhanced in-vitro and in-vivo osteoregenerative potential. *BMC Biotechnol*.  
566 2014;14(105):1–10.
- 567 54. Tsai A-C, Liu Y, Yuan X, Ma T. Compaction, fusion, and functional activation of three-  
568 dimensional human mesenchymal stem cell aggregate. *Tissue Eng Part A*. 2015;21(9–  
569 10):1705–19.
- 570 55. Kim M, Yun H, Young D, Byung P, Choi H. Three-Dimensional Spheroid Culture

- 571           Increases Exosome Secretion from Mesenchymal Stem Cells. *Tissue Eng Regen Med.*  
572           2018;15(4):427–36.
- 573   56.   Bellotti C, Duchi S, Bevilacqua A, Lucarelli E, Piccinini F. Long term morphological  
574           characterization of mesenchymal stromal cells 3D spheroids built with a rapid method  
575           based on entry-level equipment. *Cytotechnology.* 2016;1–12.
- 576   57.   Neufeld TP. Autophagy and cell growth - the yin and yang of nutrient responses. *J Cell*  
577           *Sci.* 2012;125(10):2359–68.
- 578   58.   Ho SS, Hung BP, Heyrani N, Lee MA, Leach JK. Hypoxic Preconditioning of  
579           Mesenchymal Stem Cells with Subsequent Spheroid Formation Accelerates Repair of  
580           Segmental Bone Defects. *Stem Cells.* 2018;36(9):1393–403.

581

**A**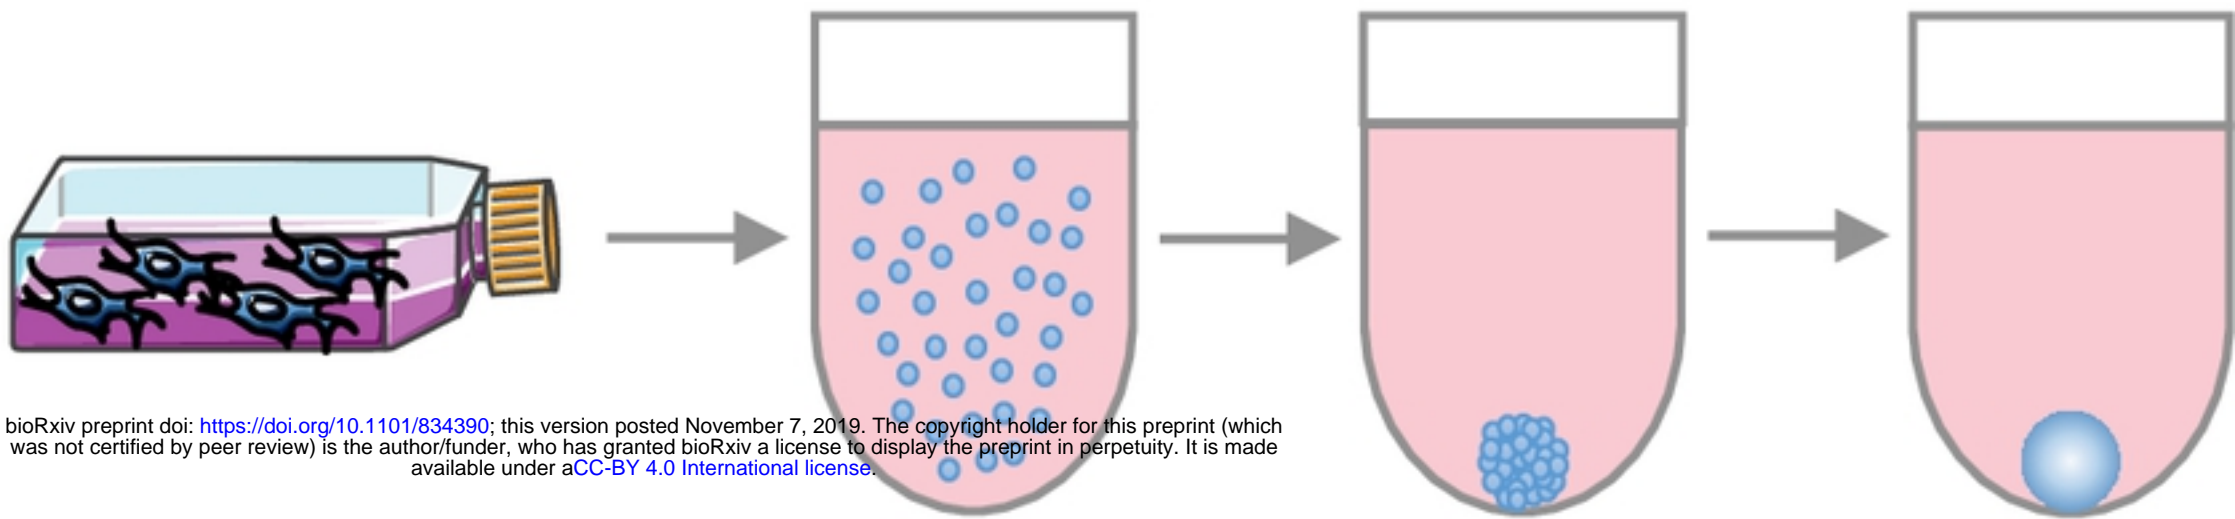

bioRxiv preprint doi: <https://doi.org/10.1101/834390>; this version posted November 7, 2019. The copyright holder for this preprint (which was not certified by peer review) is the author/funder, who has granted bioRxiv a license to display the preprint in perpetuity. It is made available under aCC-BY 4.0 International license.

**One week before****Day 0****Few hours later****Day 1-21**

MSC expansion in  
2D

Plate 30 000  
cells

Cell  
aggregation

Spheroid  
analysis

**B****0.25 %****0.5 %****1 %****H4100**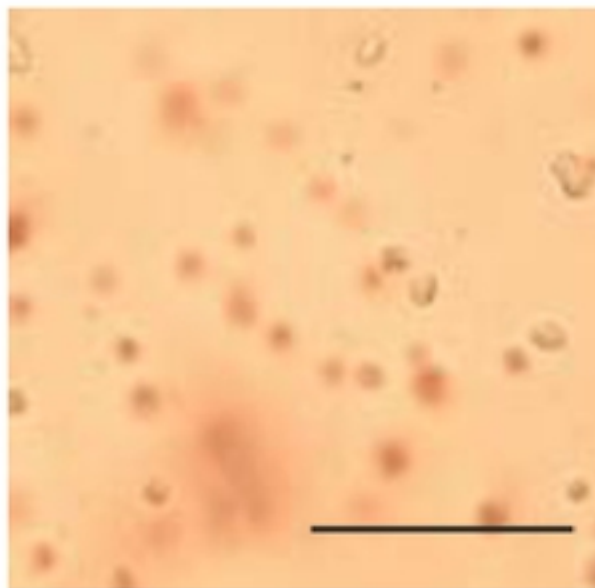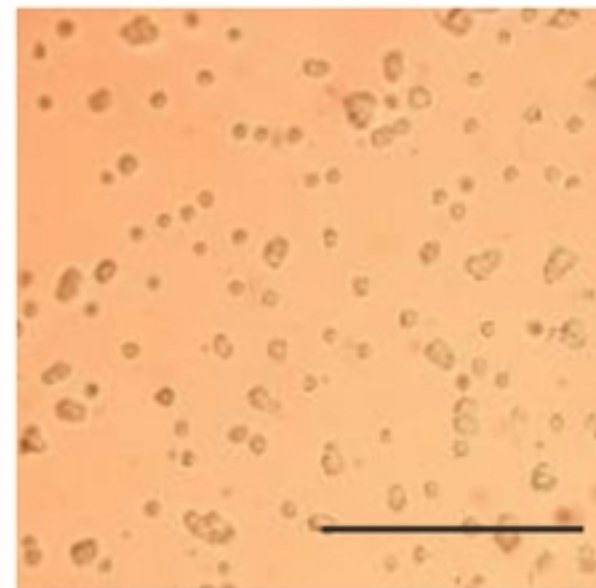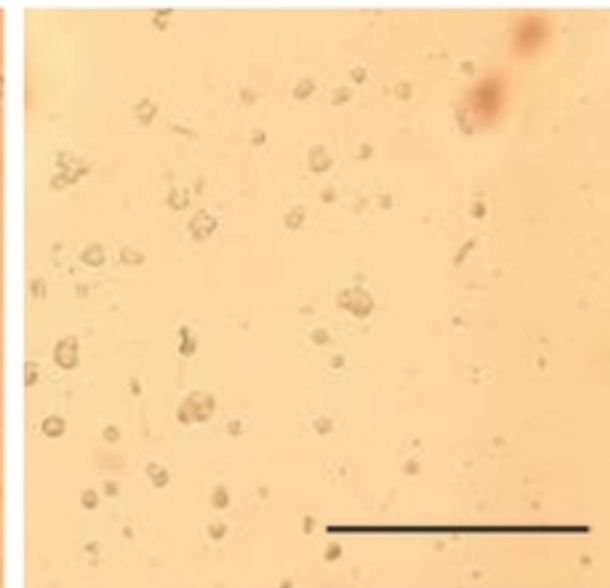**SF H4236**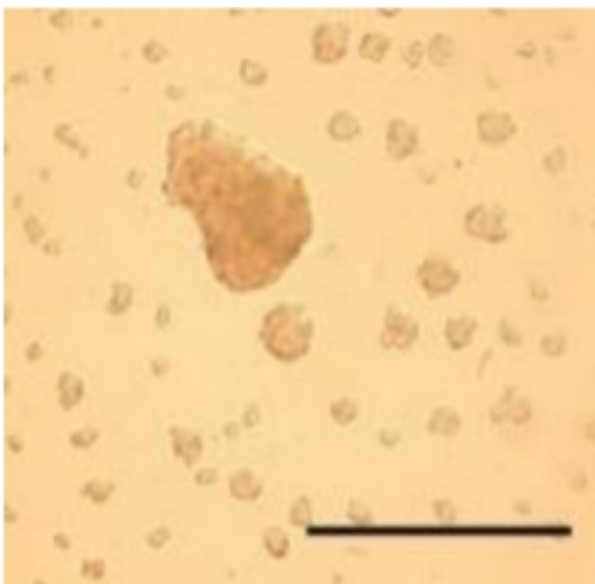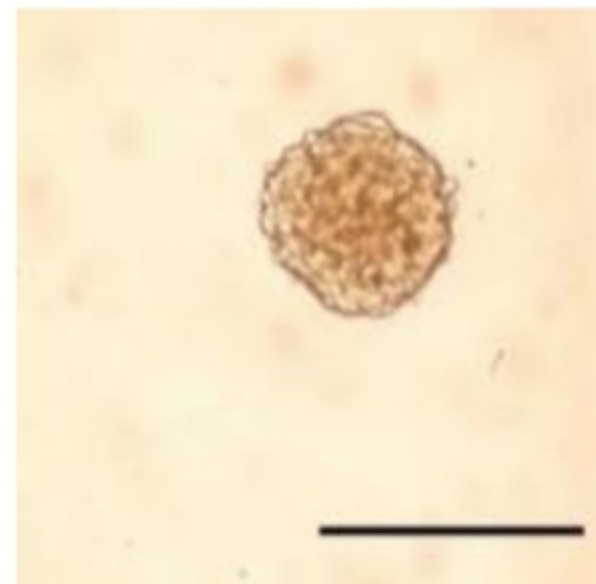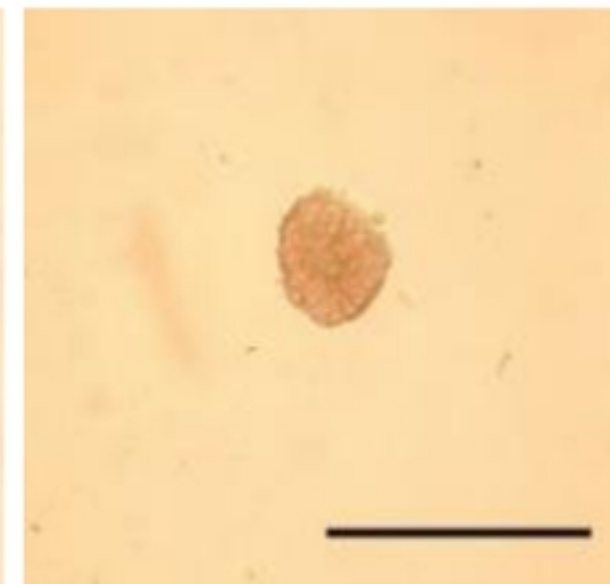**Fig1**

A

Day 1

Day 3

Day 7

Day 14

Day 21

bioRxiv preprint doi: <https://doi.org/10.1101/834390>; this version posted November 7, 2019. The copyright holder for this preprint (which was not certified by peer review) is the author/funder, who has granted bioRxiv a license to display the preprint in perpetuity. It is made available under aCC-BY 4.0 International license.

Primary hMSCs

HS-27a

HS-5

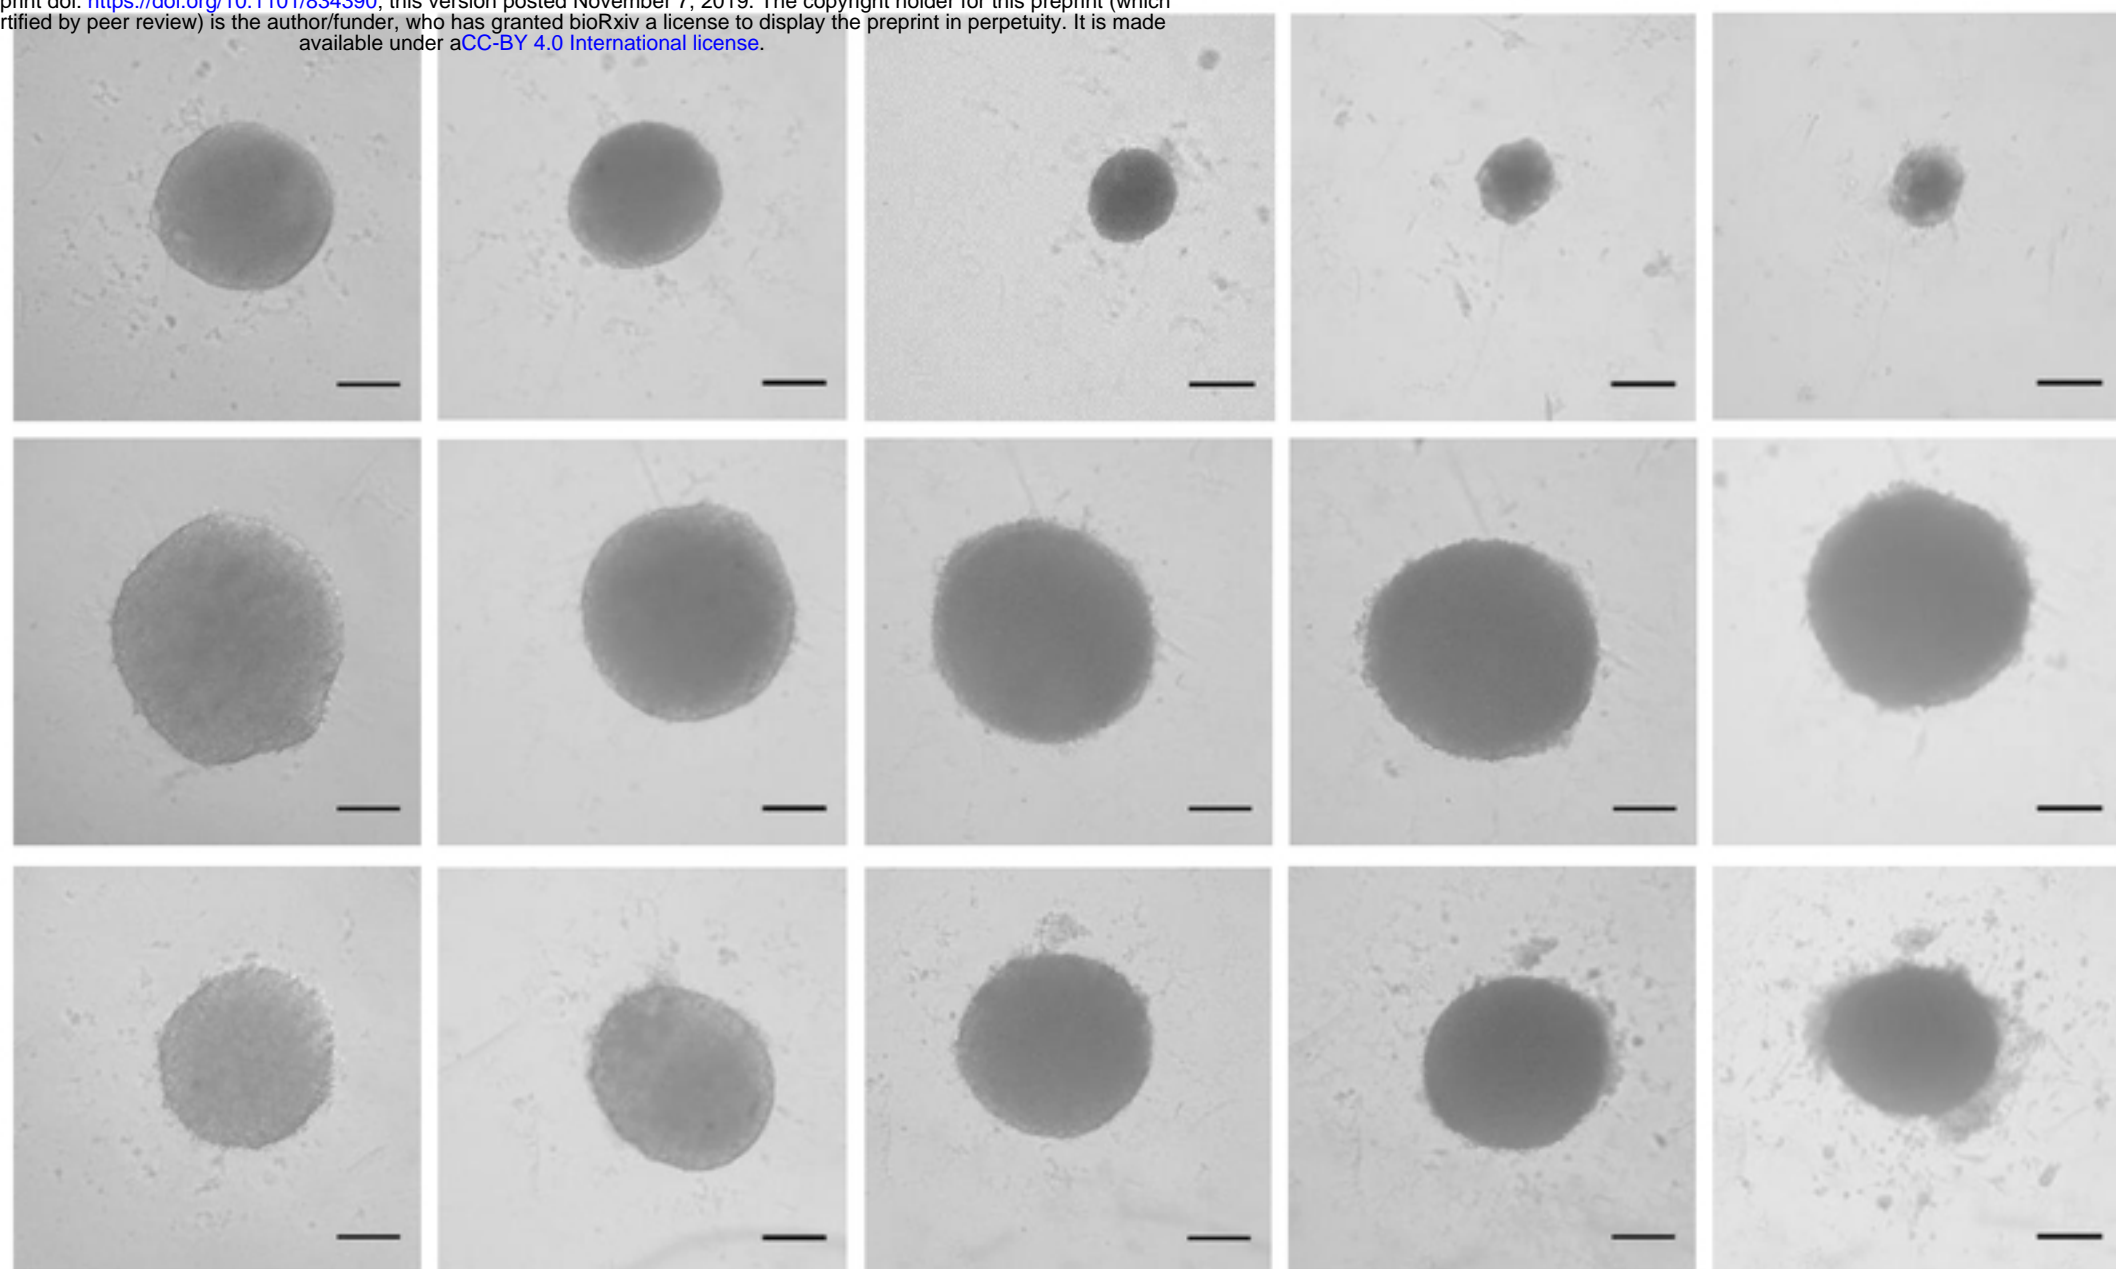

B

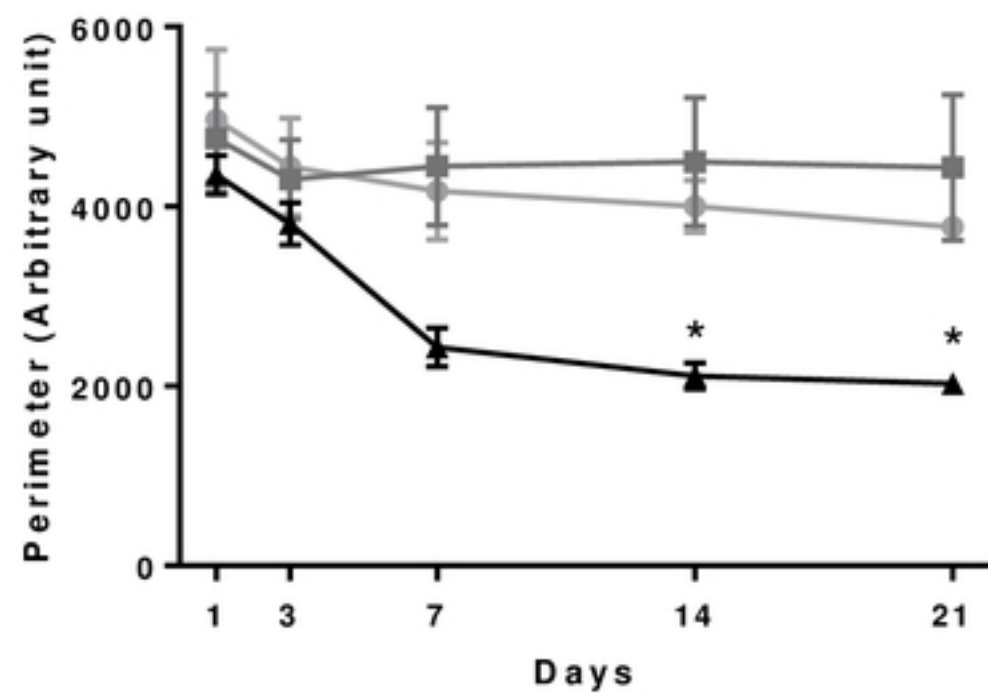

C

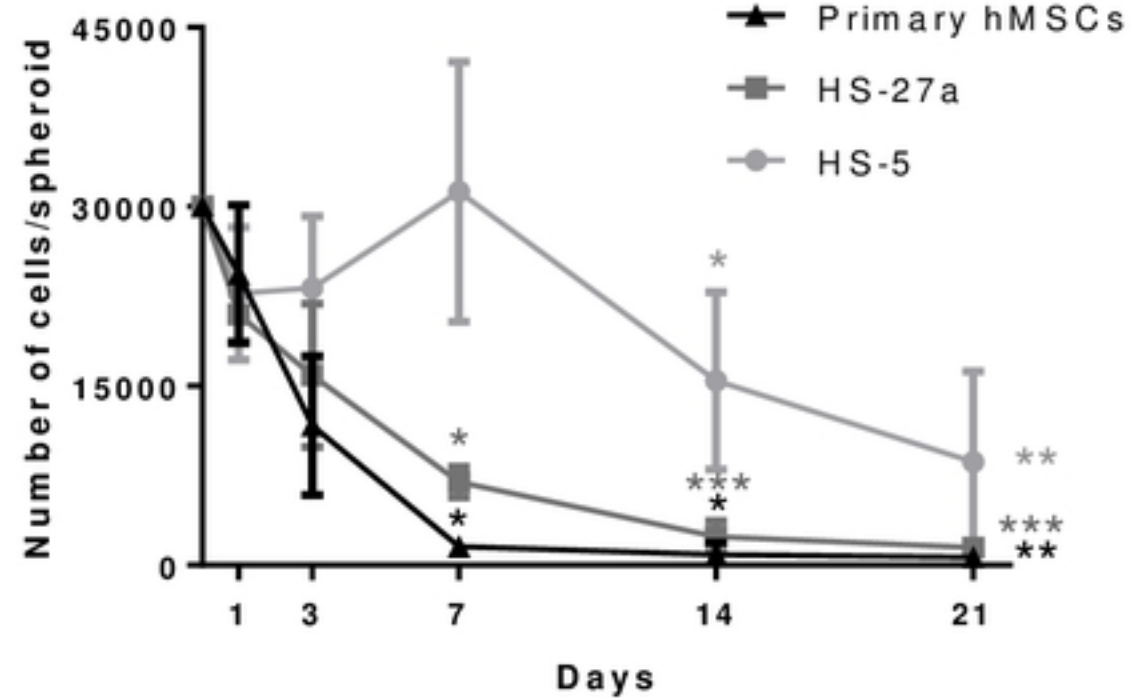

Fig2

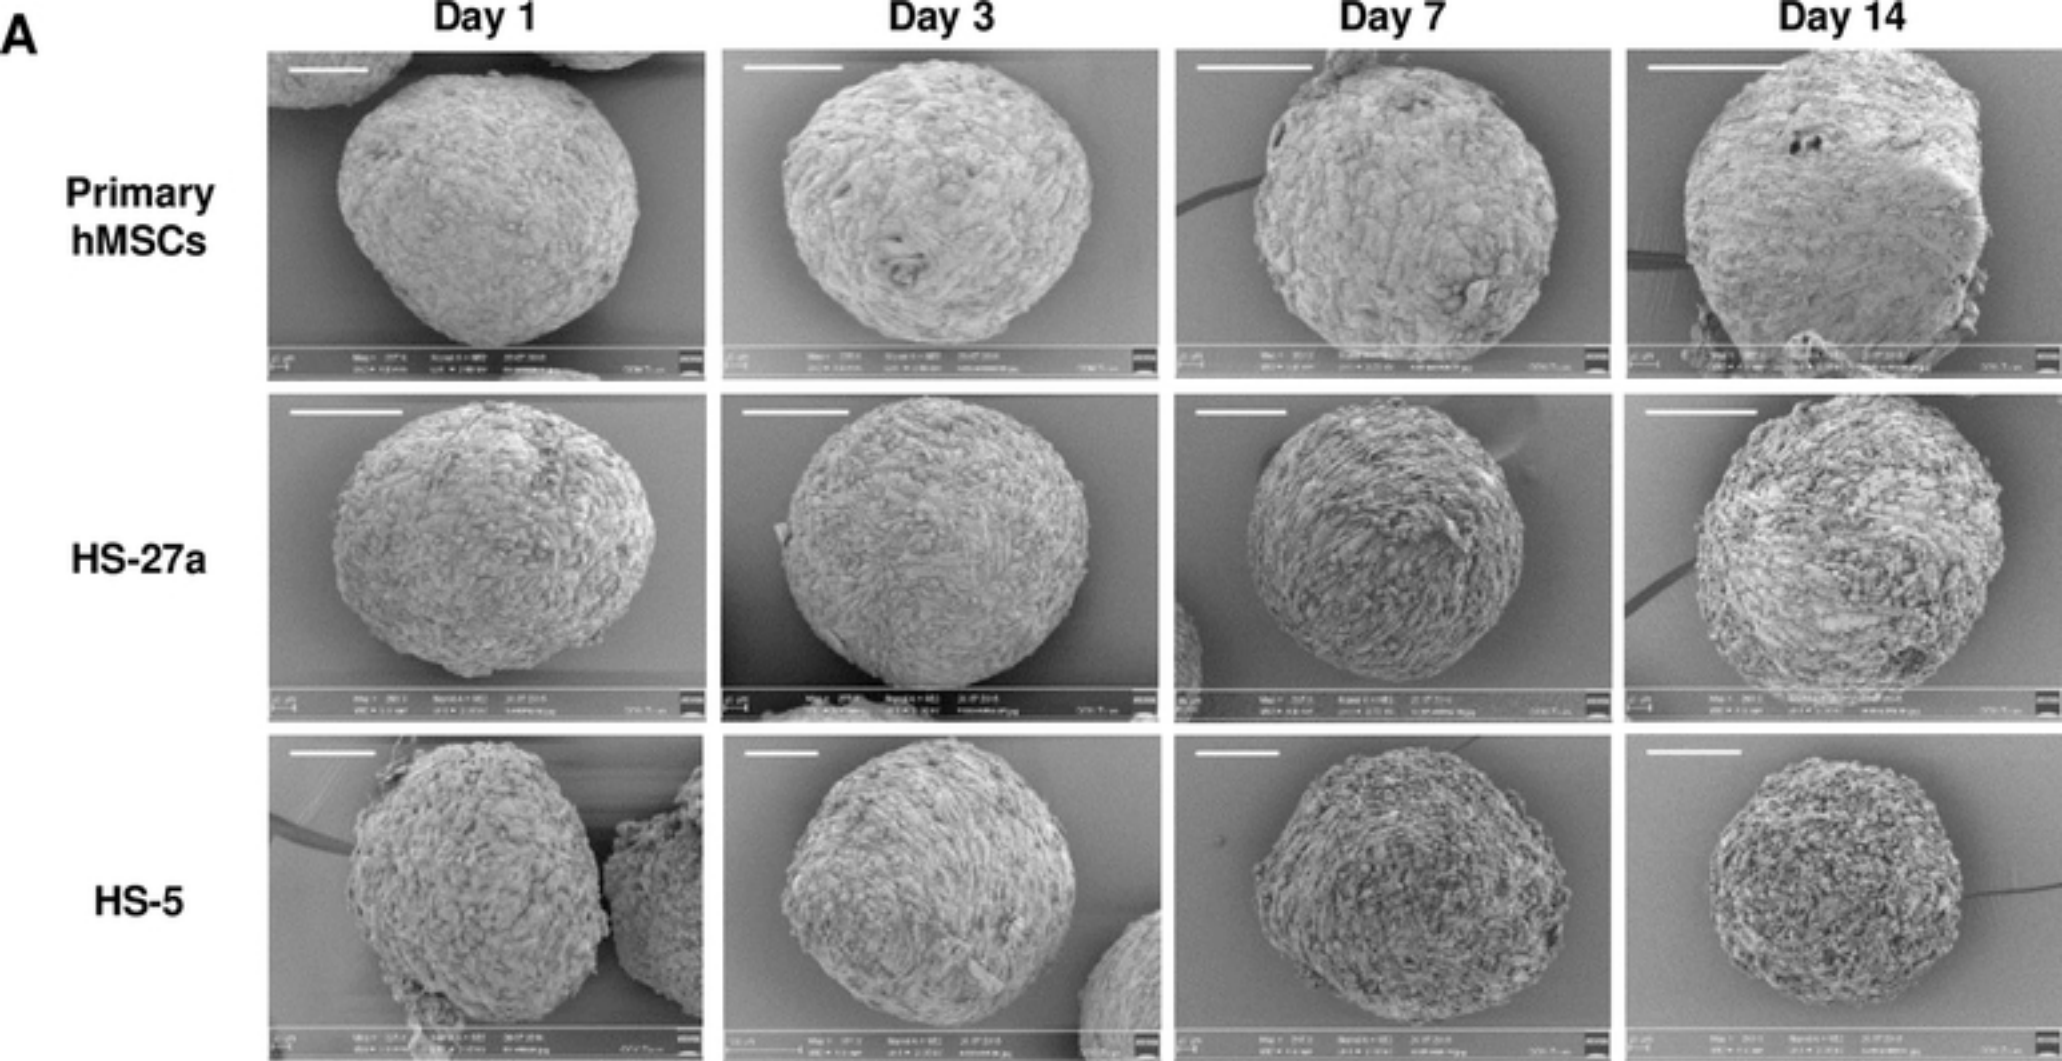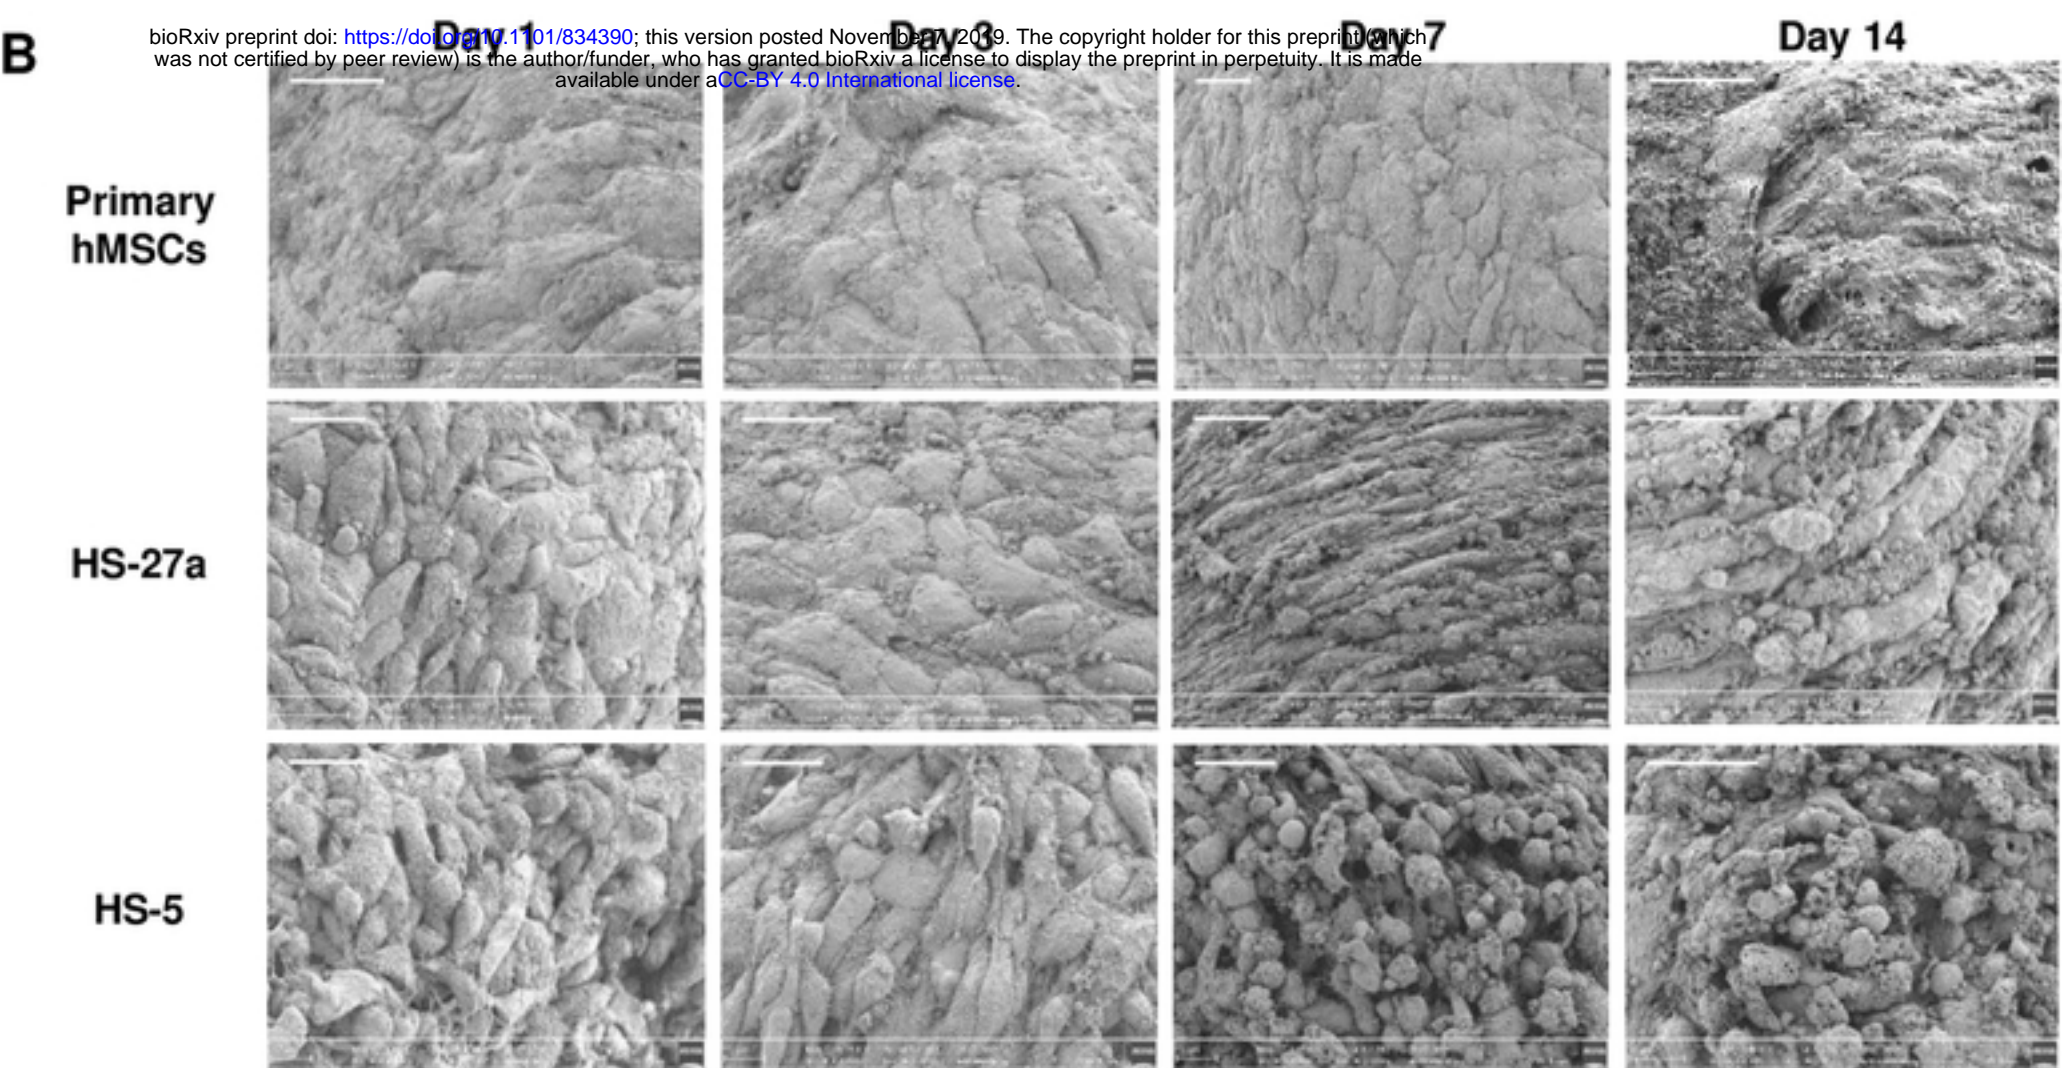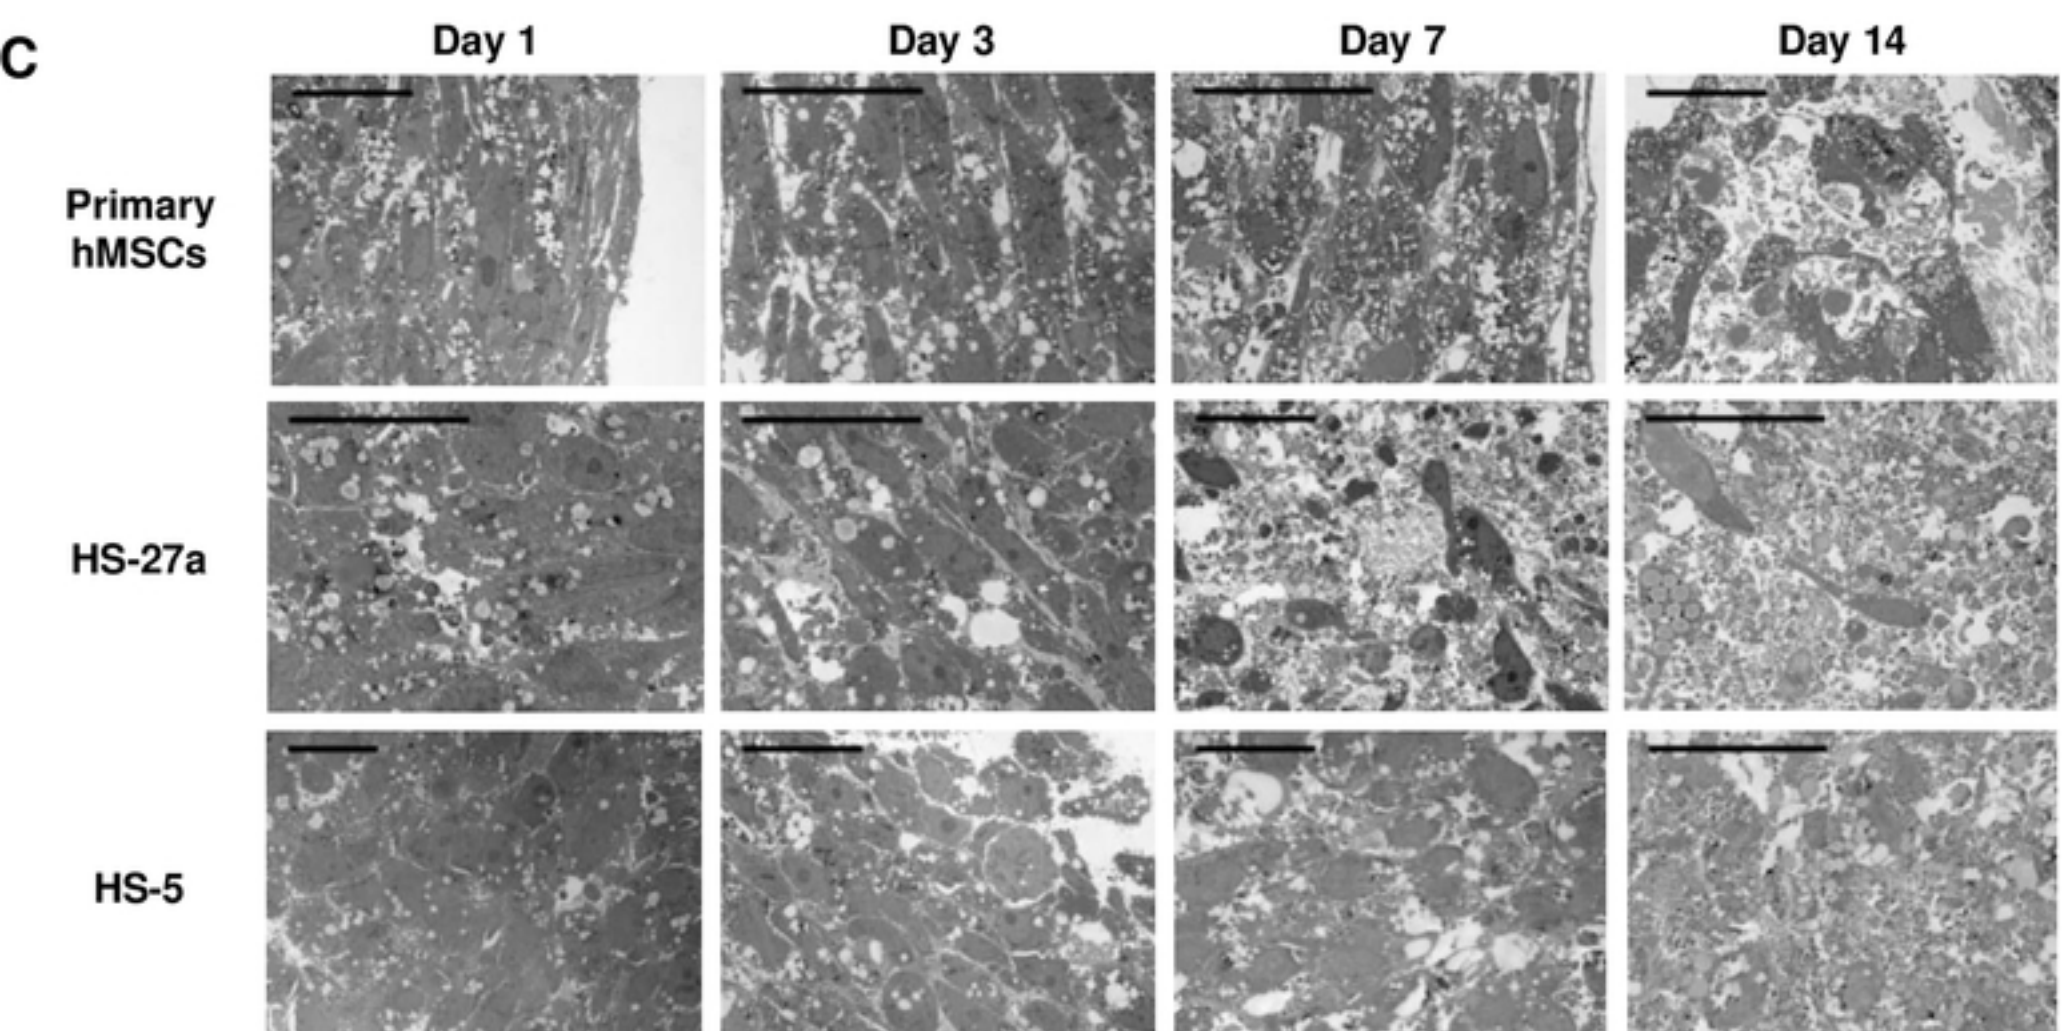

Fig3

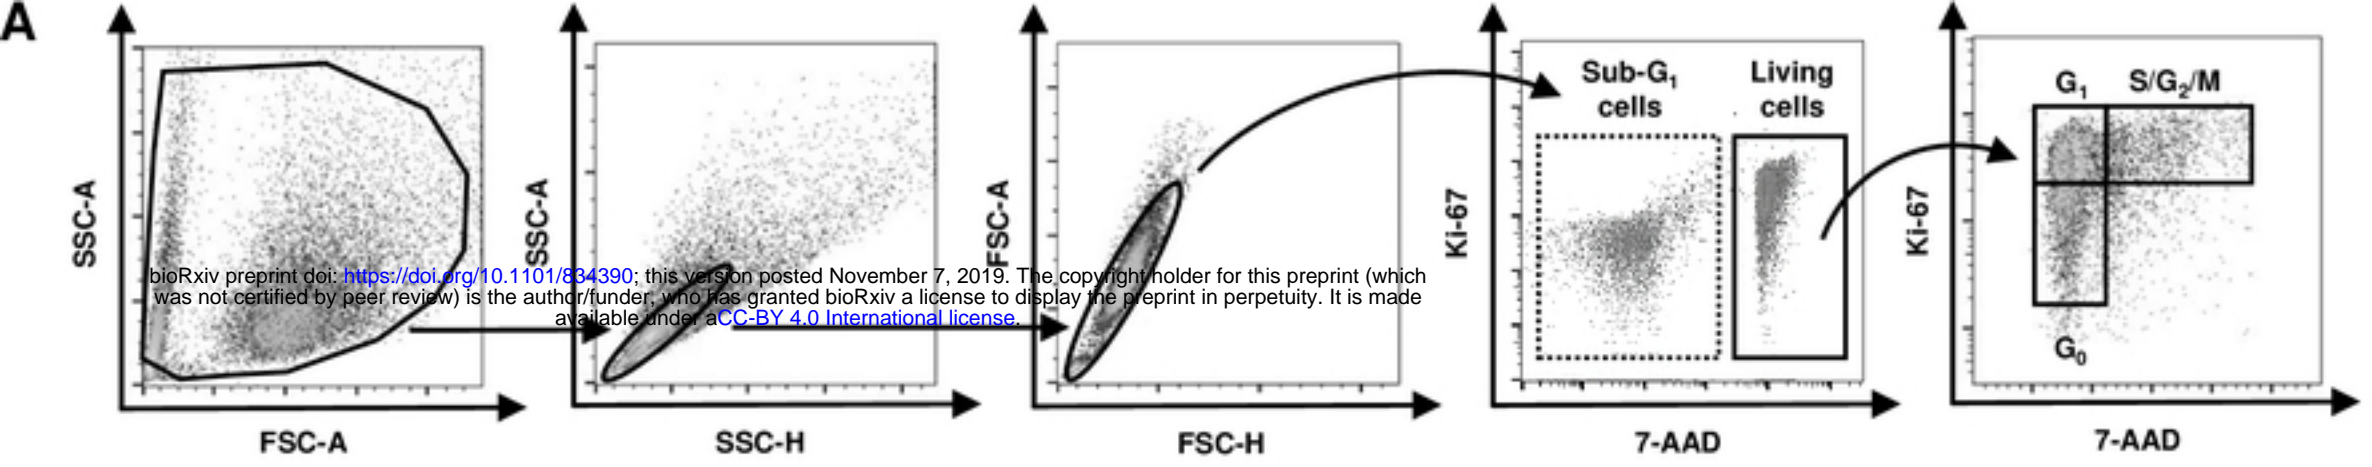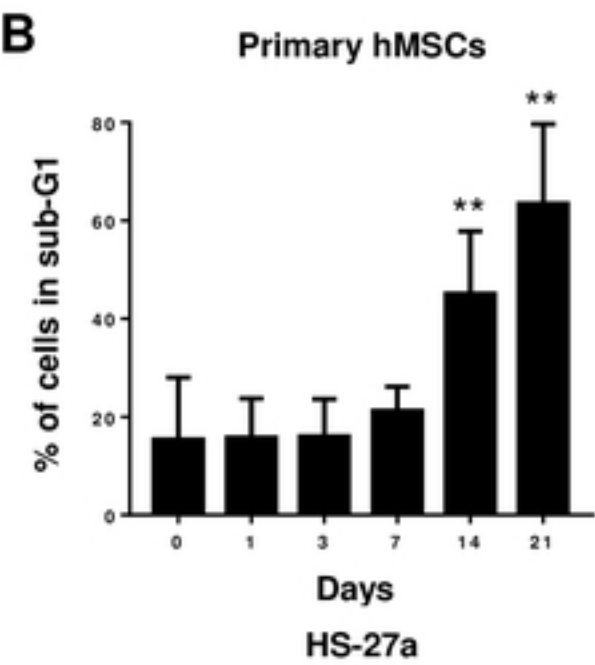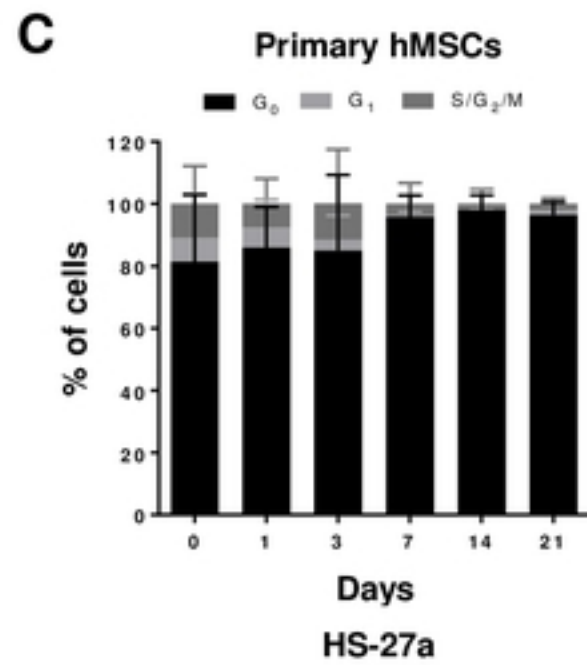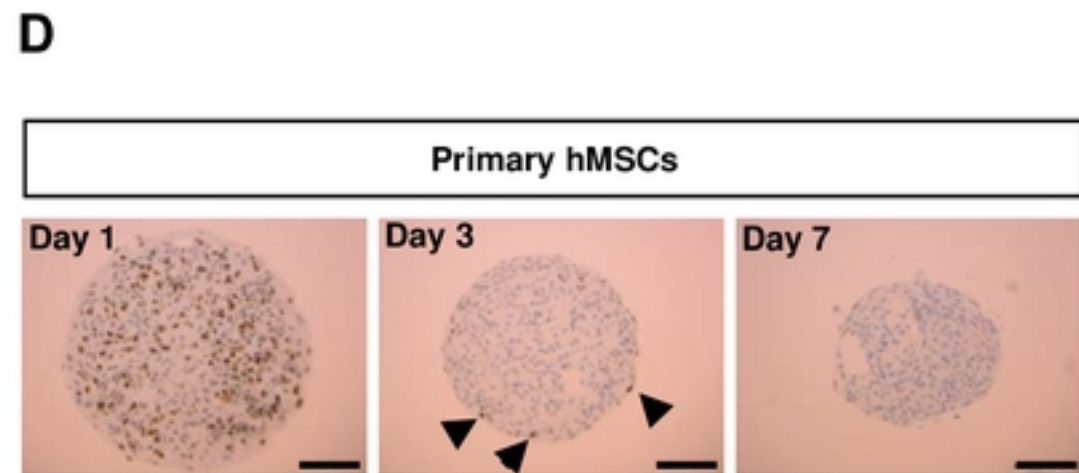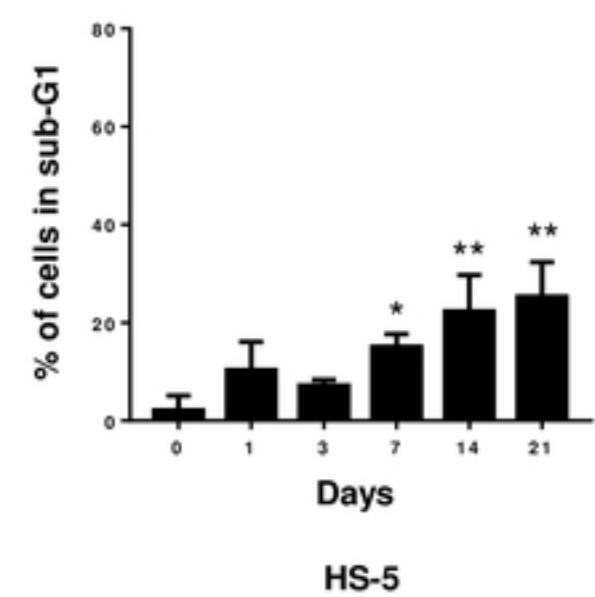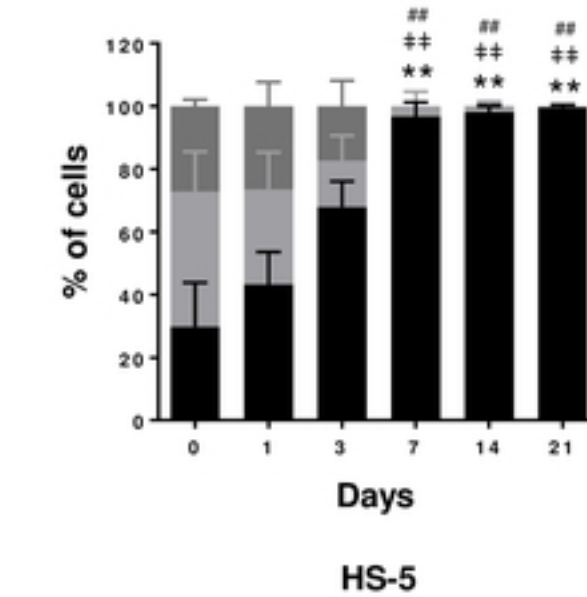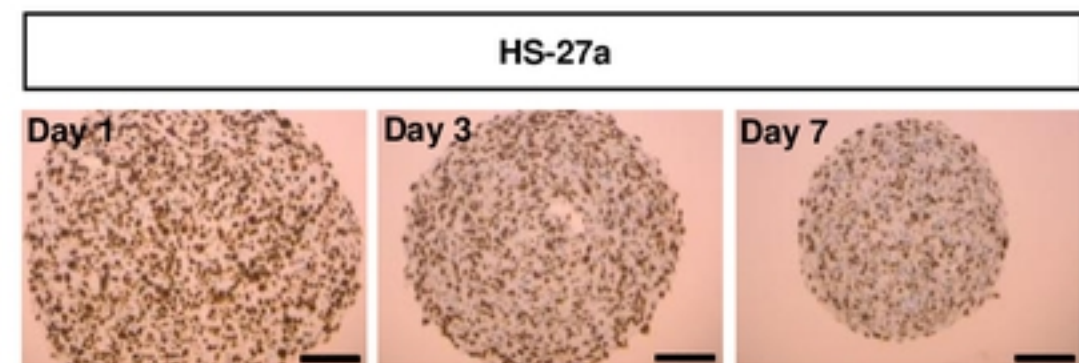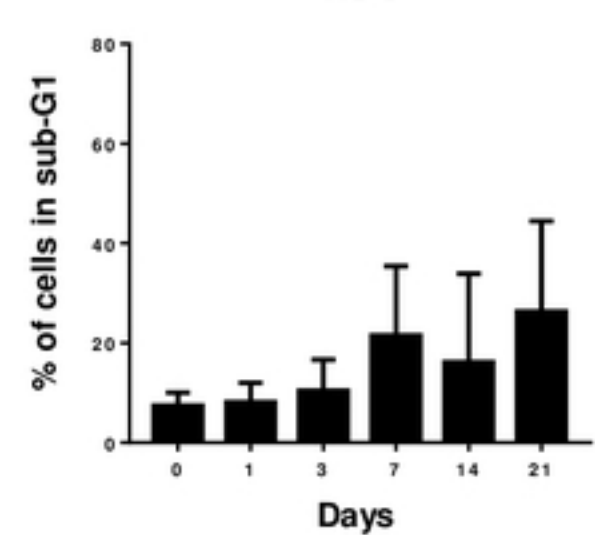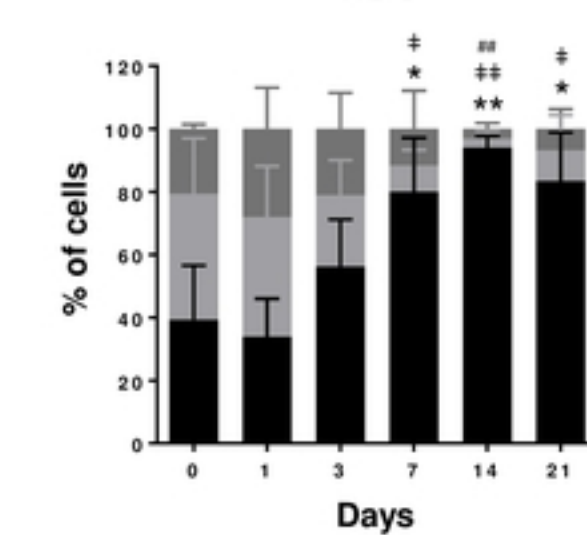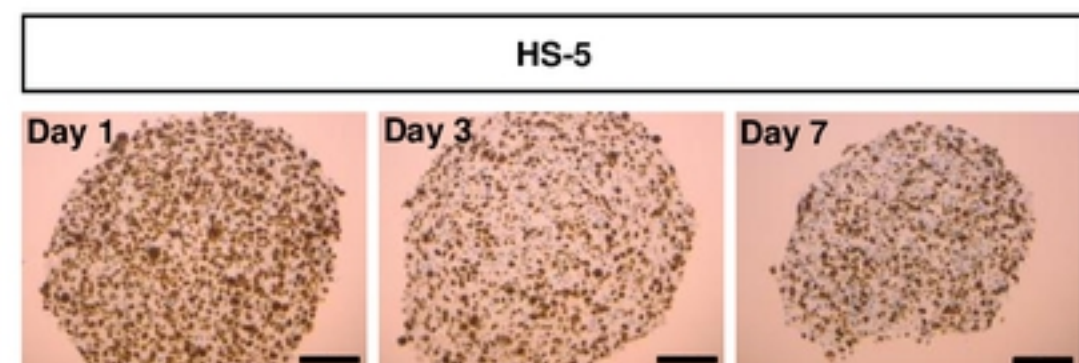

Fig4



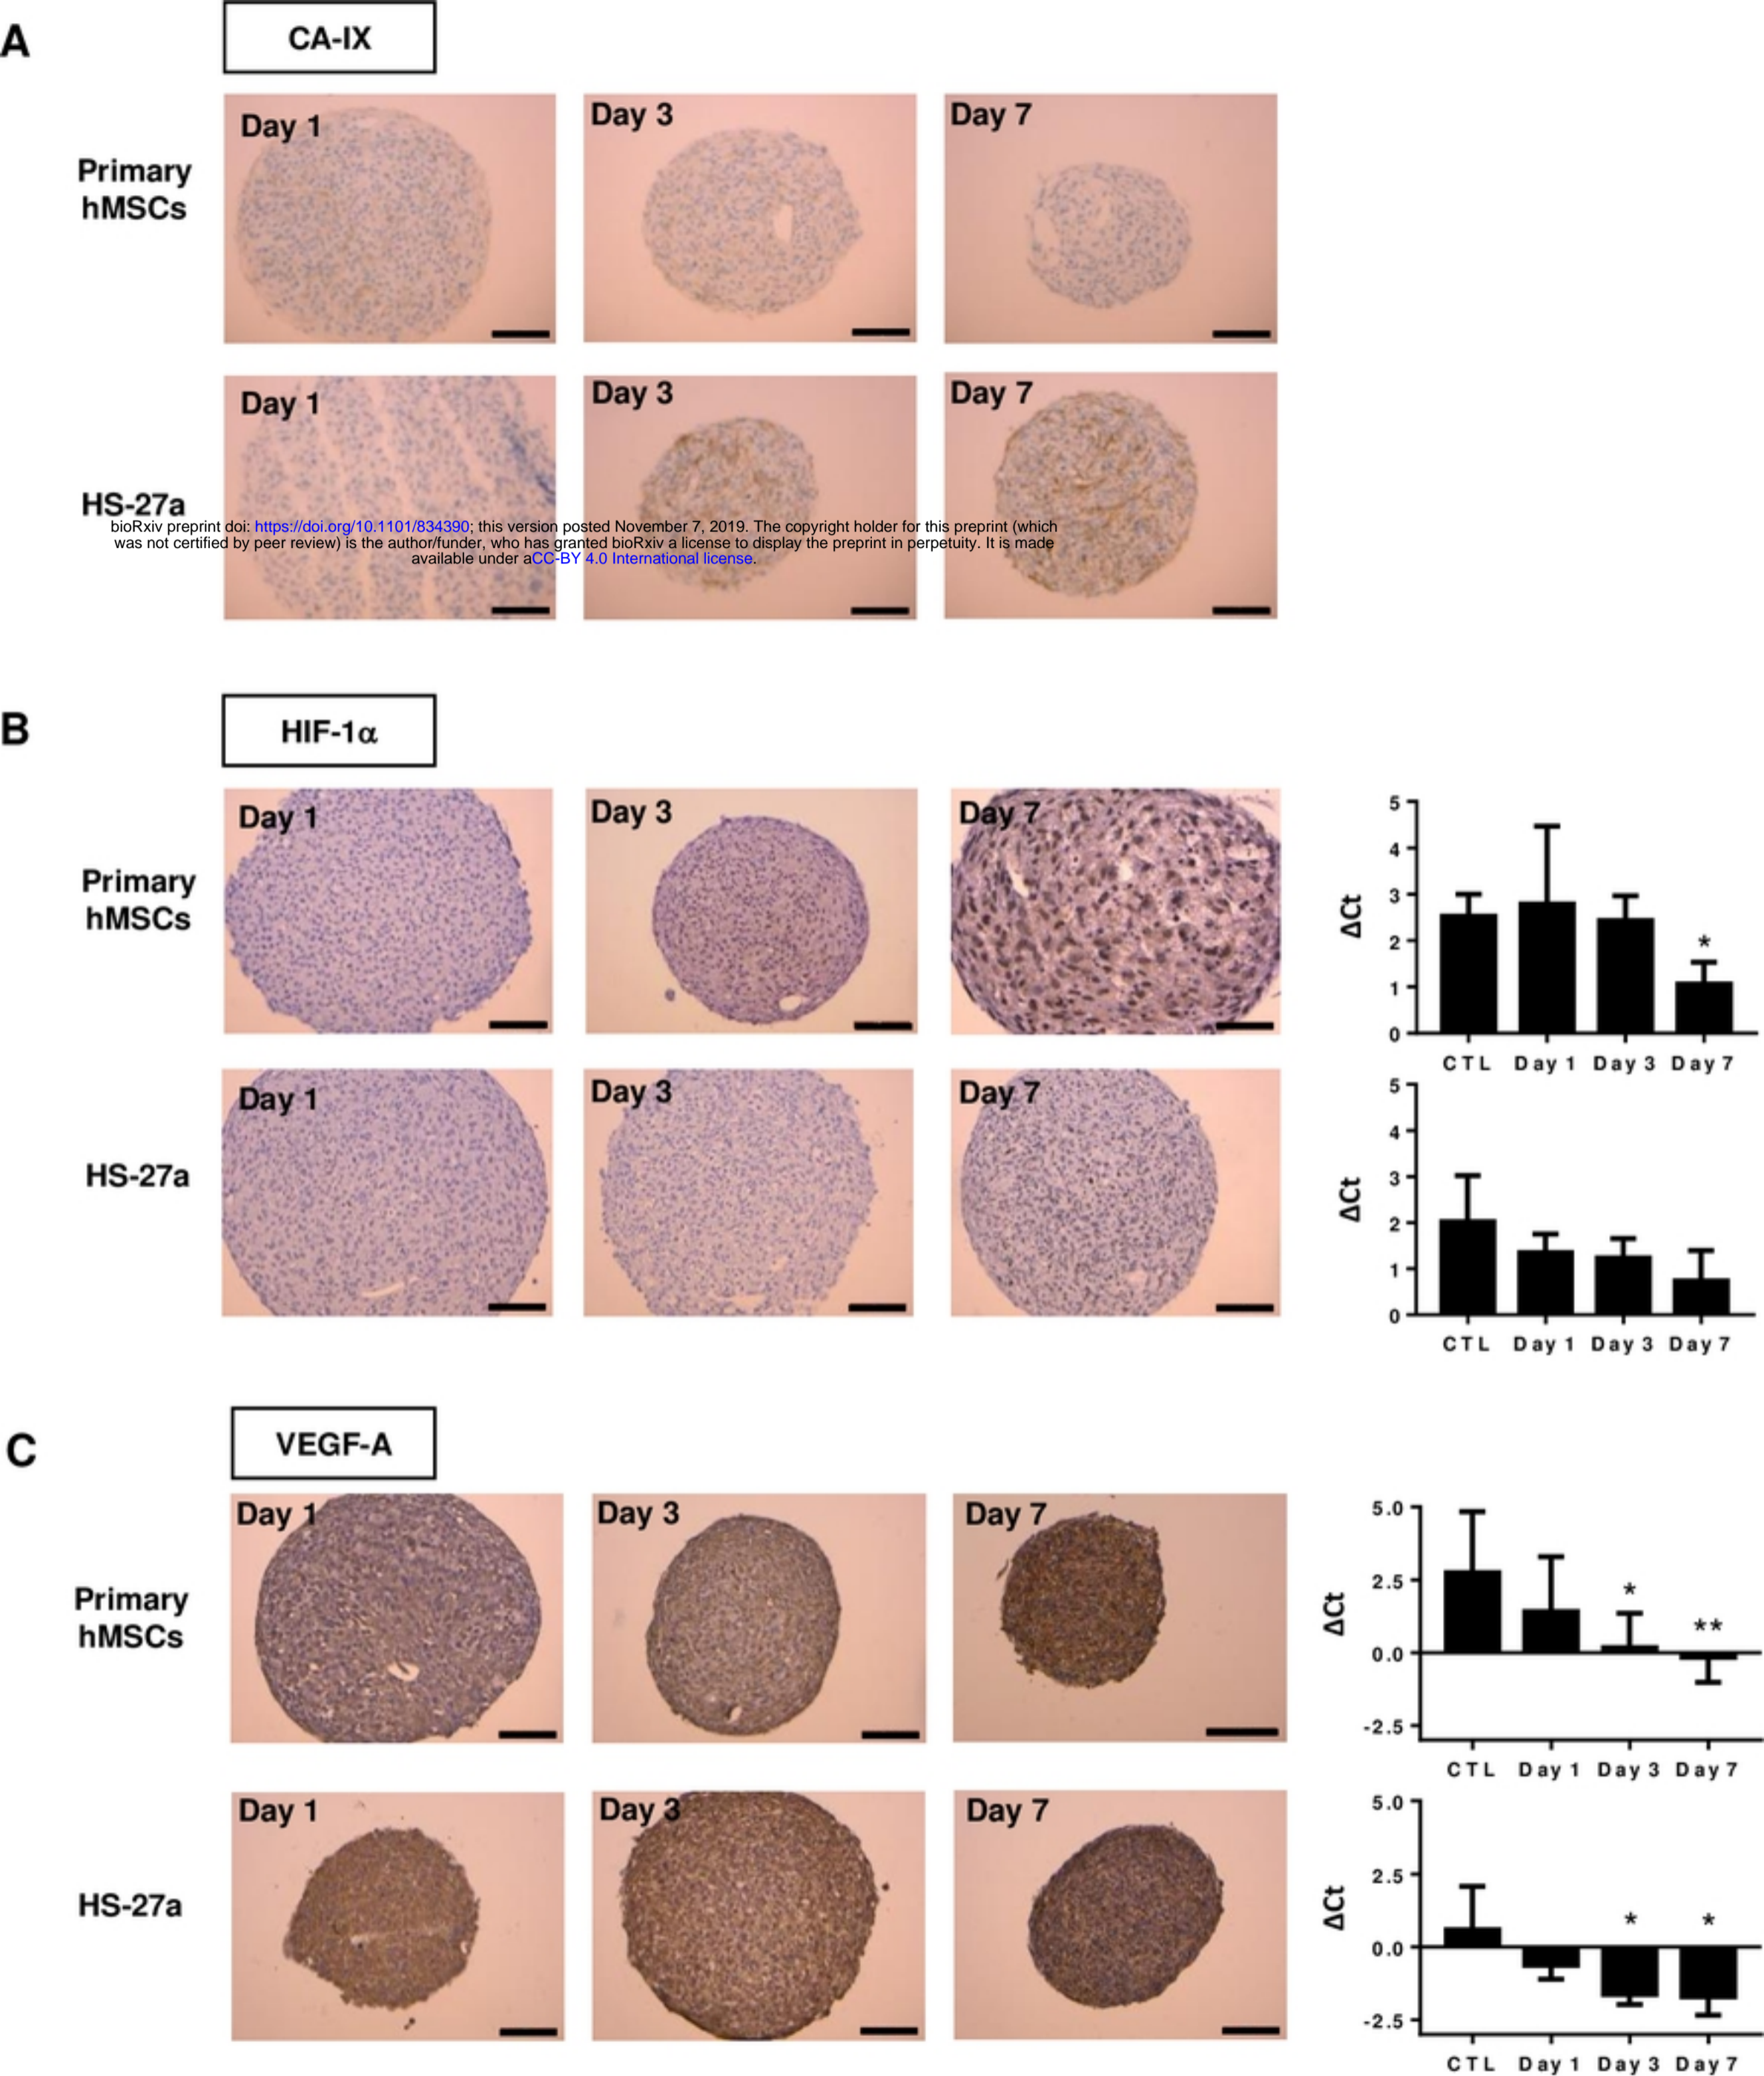

Fig5

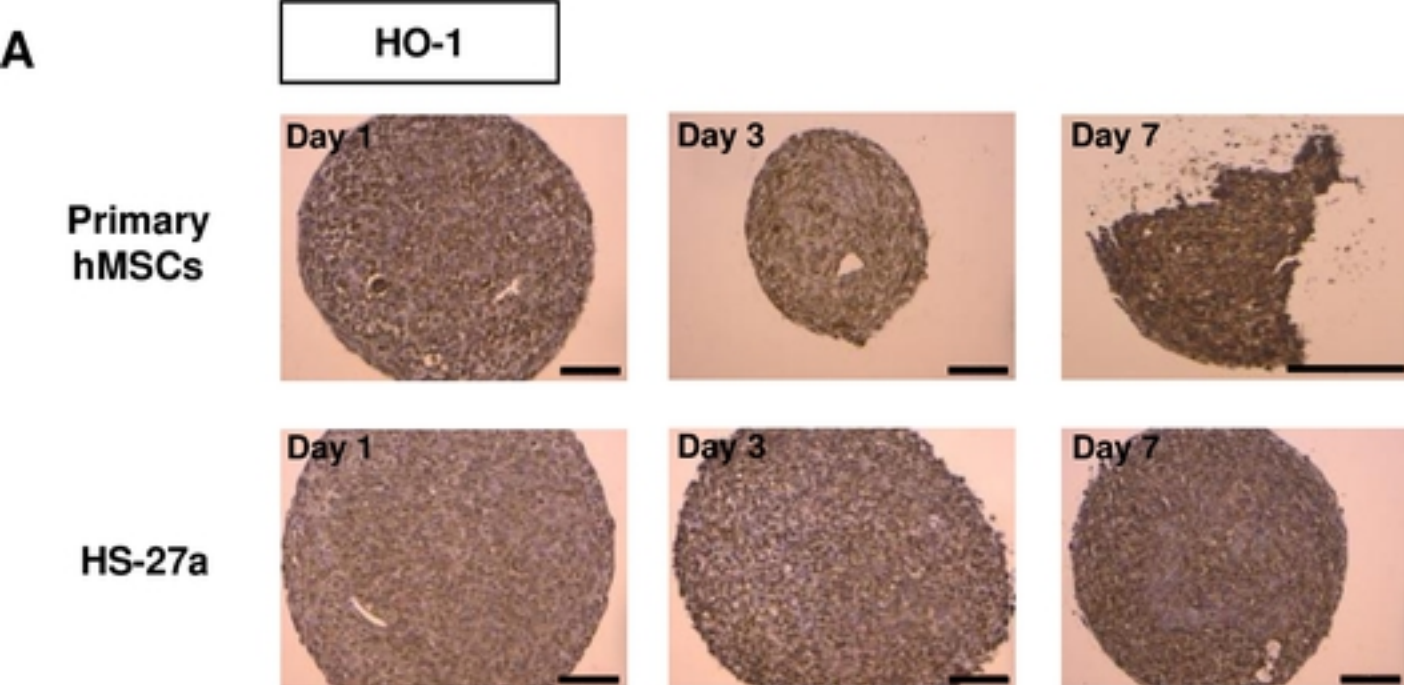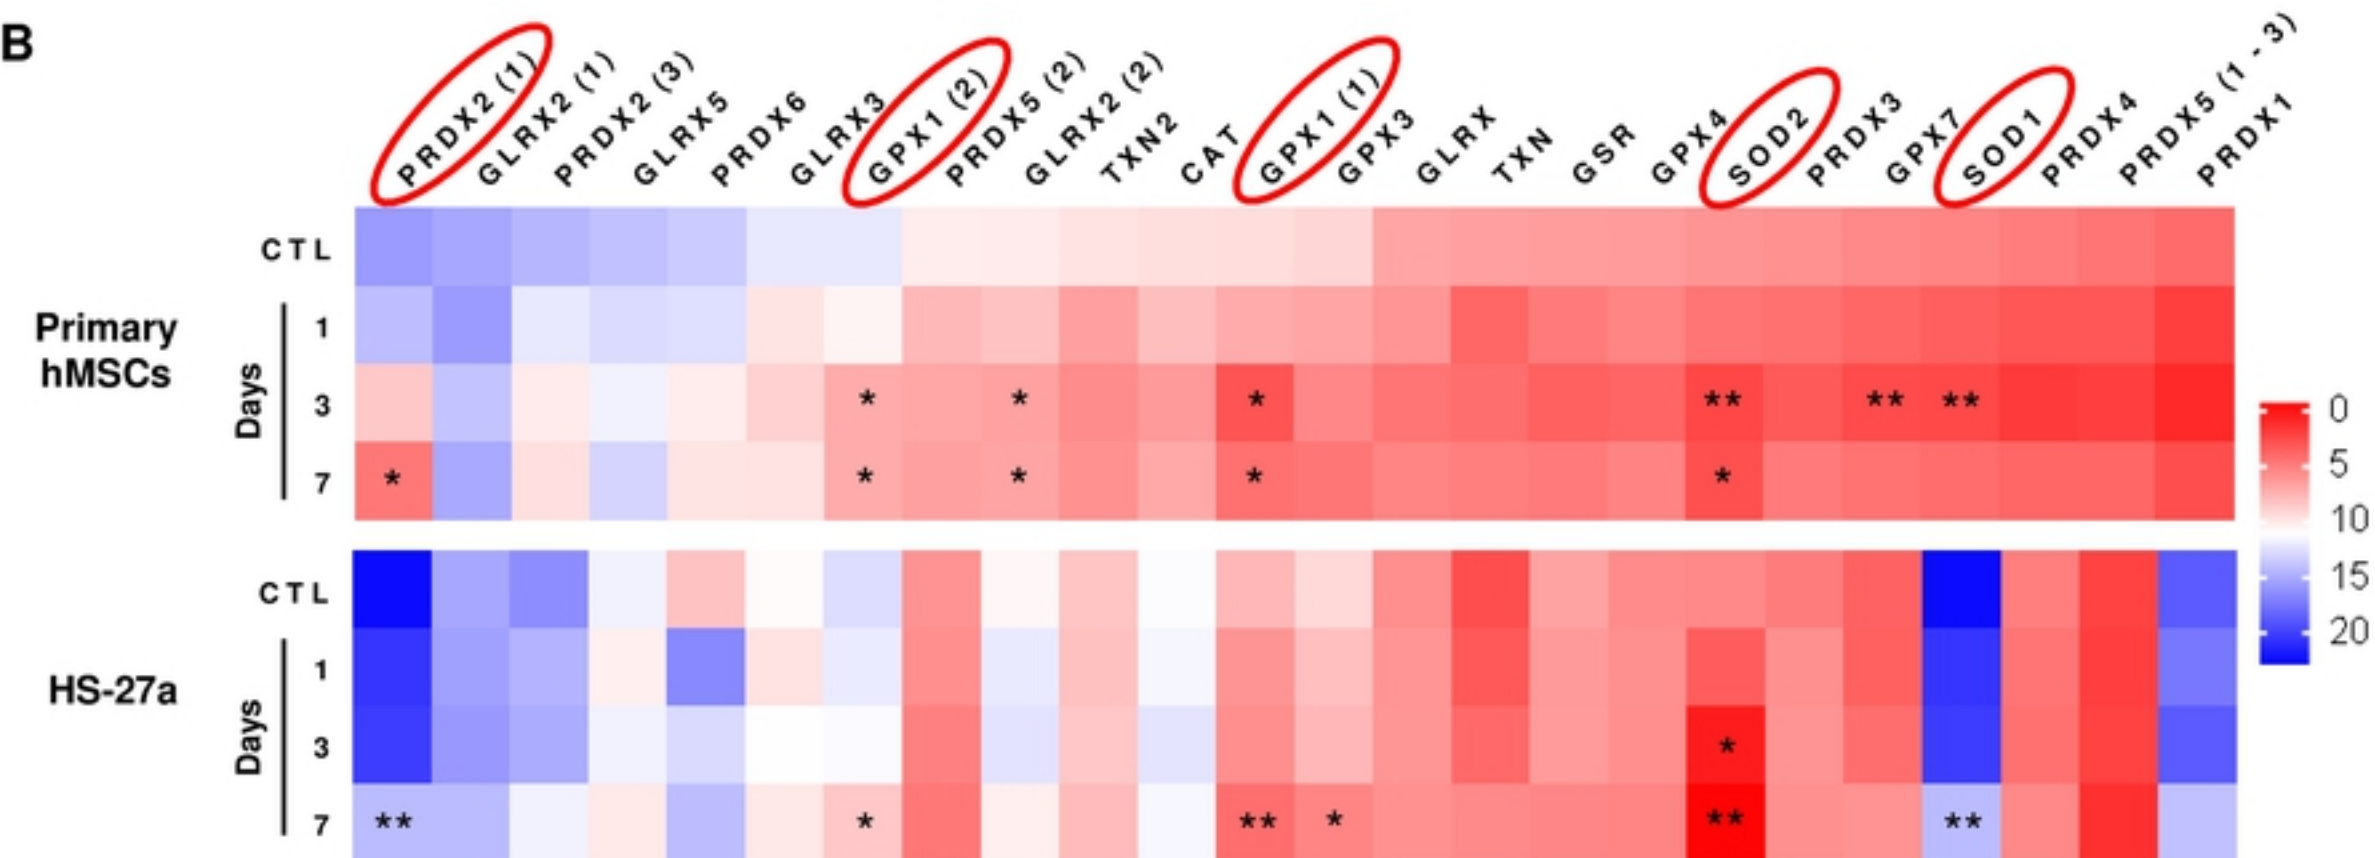

Fig6

**A**

Primary hMSCs

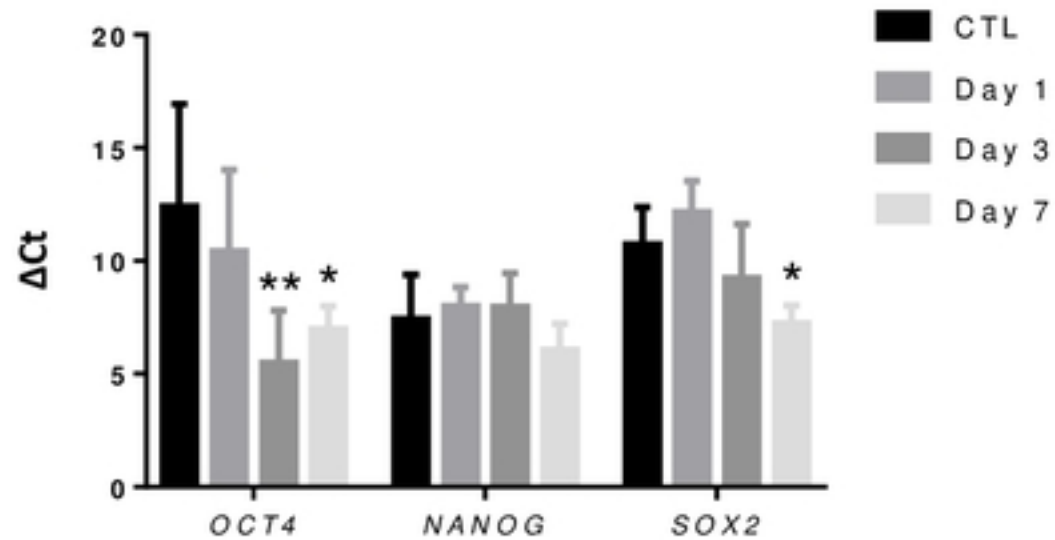**B**

HS-27a

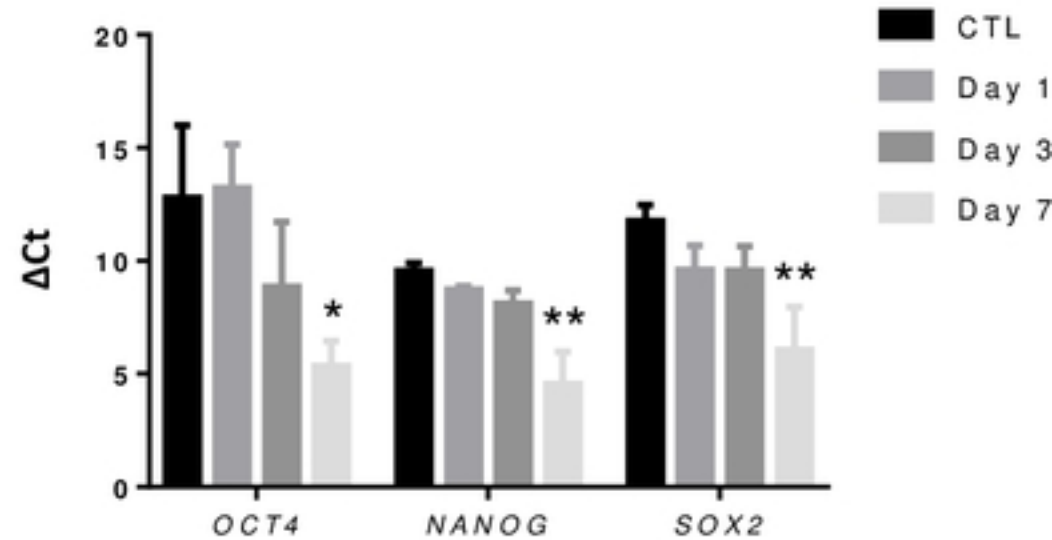

Fig7
